# Supplementary material for: Adaptive evolution of sesquiterpene deoxyphomenone in mycoparasitism by Hansfordia pulvinata associated with horizontal gene transfer from Aspergillus species
Source: bioRxiv or medRxiv preprint supplement (doi:10.1101/2024.03.22.586281), 2024-04-11
Supplement: Supplementary file [file media-1.pdf]

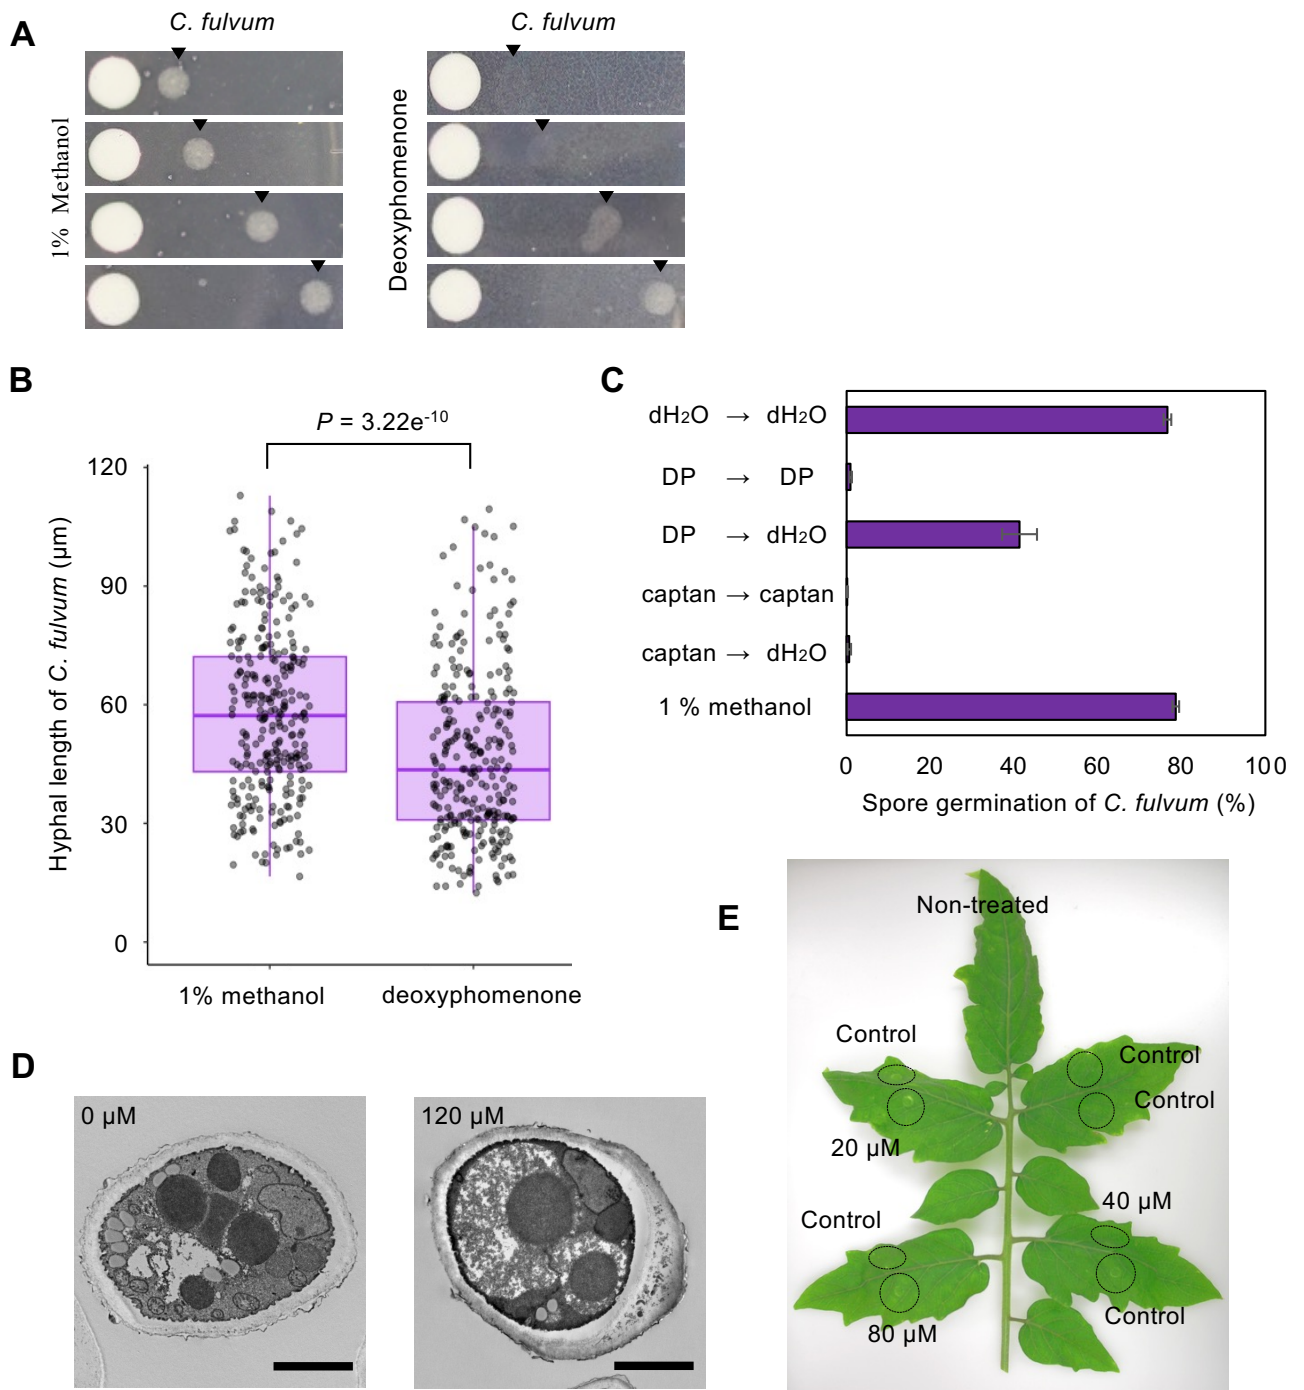

**Figure S1. Effect of deoxyphomenone on *Cladosporium fulvum* and tomato leaves.**

Deoxyphomenone (120  $\mu\text{M}$ ) and 1% methanol (v/v) as a control were used. (A) Effect on spore germination. A filter paper containing deoxyphomenone was placed on the left on PDA, then a spore suspension of *C. fulvum* was dropped (arrowheads) at different distances from the paper and incubated at 25 °C for 2 weeks. (B) Effect on hyphal elongation. Spores were germinated in a sterile distilled water at 25 °C for 24 h. Germinated spores were treated with deoxyphomenone, then hyphal length was measured after 24 h using a light microscope. The line in the center of the box indicates the median; box margins represent the 25th and 75th percentiles. The length of the box is the interquartile range; whiskers indicate the minimum and maximum. Significant differences among treatments were determined using Tukey's test. (C) Fungistatic activity of deoxyphomenone. Spores of *C. fulvum* were suspended in distilled water (dH<sub>2</sub>O), deoxyphomenone (DP) or 100  $\mu\text{M}$  fungicide captan for 24 h, then solutions were replaced with fresh solutions as shown, and treated for a further 24 h. Germinated spores were counted using a light microscope. Continuous treatment with dH<sub>2</sub>O or 1% methanol (v/v) was used as a positive control. Values are the means of three replicates ( $\pm$  SD). (D) Transmission electron micrographs of interior of *C. fulvum* spores 24 h after treatment with deoxyphomenone. Bars = 2  $\mu\text{m}$ . (E) Evaluation of 20, 40 and 80  $\mu\text{M}$  deoxyphomenone or 1% methanol (v/v) as a control for toxicity on tomato leaves 2 weeks after 1-month-old leaves were injected with the compound.

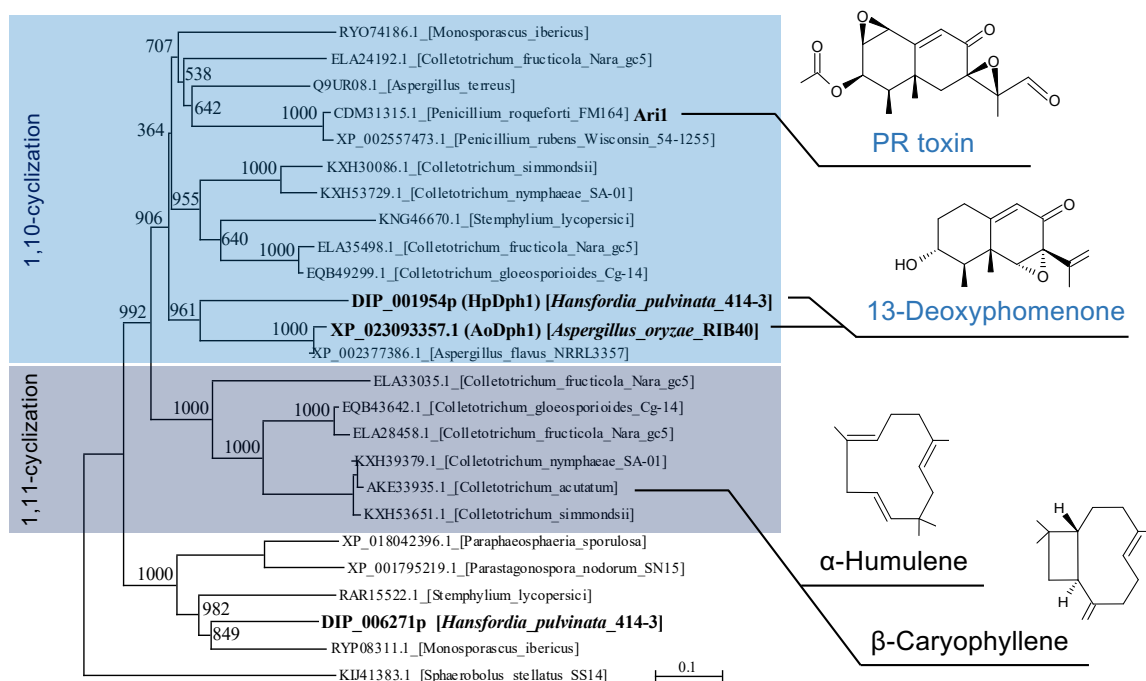

**Figure S2. Phylogenetic tree of fungal sesquiterpene cyclases.**

The phylogenetic tree was generated from amino acid sequences encoding sesquiterpene synthases by maximum likelihood phylogenetic analysis. Predicted aristolochene synthase-like proteins identified in *H. pulvinata* 414-3 and *A. oryzae* RIB40 genome sequences, and the aristolochene synthase Aril are shown in bold.

GenBank/EMBL/DBJ accession numbers or unique numbers for *H. pulvinata* are indicated. *Sphaerobolus stellatus* (Basidiomycota) was used as an outgroup. Numbers beside the branches represent bootstrap values based on 1000 replicates. The scale bar corresponds to 0.1 estimated amino acid substitutions per site. Representative metabolites and proteins associated with their cyclization are connected by lines.

|                      |     |                                                      |                                                      |     |
|----------------------|-----|------------------------------------------------------|------------------------------------------------------|-----|
| DIP-001954p(HpDPH1)  | 1   | MLSTLRSFELHKLGLTGSSNDSTTTTTTTTAAASAPQPKAQQQPQ        | AYPSEEDMARDRRRFPPLAATDTASPSPSAFAPEIHPADRVSREVAE      | 100 |
| XP_023093357(AoDPH1) | 1   | -----MLQRLWALSTSAIKLFPQFSPFGAPRD                     | LL-----IEKDRRSMPCLA----KEAPPPSAFSAIHPILSDSVSTEVND    | 67  |
| DIP-001954p(HpDPH1)  | 101 | AFLARWPFGEAERRFRADFPVTCLYFPFHARAERIGFACRLTLLFL       | VDDLLEEMGLEEGSAYNERLISISKGDEEPEPKPAEVLTRLEWDMRAC     | 200 |
| XP_023093357(AoDPH1) | 68  | YFLQNWPFRTDNERARFHAAGFSRVTCLYFPFMMADDRIGFACRLTLLFL   | IDDLLEEMSLDEGTYNEKLISIRGDVAPDRITPAQWIMYDLWDMRAC      | 167 |
| DIP-001954p(HpDPH1)  | 201 | DARLAGEIKEPVTFMRAQTDGSRILTRELGAIFYREKDVGQA-----      | ----LLSALMRFSMALHLTPAQLRLAQLPERNCARHISVNDIYSWRKEV    | 290 |
| XP_023093357(AoDPH1) | 168 | DHVLADELLEFPVTFMRAQTDKTRLTTHQFGEYLDYREKDVGVGQAIKAQTK | CIRSLLSGLQRYTMKLYLTEEDLRMAAPAERNCAKHIAILNDIYSWRKEL   | 267 |
| DIP-001954p(HpDPH1)  | 291 | RASETLHEEGAALCSSVAFLAAEASVPASGARRVLWALCREWEAEHRRME   | GDLLRRLVEEEEEEGDQGGQVLRVYVIRGLESQMSGNERWSESTPRYHKVK* | 391 |
| XP_023093357(AoDPH1) | 268 | LASKTLHEEGAALCSSVQLSEVTALSHAATQRLVLTMCREWESVHKQL-    | -----VTEVAGTGSRLDLDYIHGLEFQMSGNERWSESTPRYHF*--       | 355 |

Identity: 197/401 (49.1%) / Similarity: 247/401 (61.6%) / Gaps: 56/401 (14.0%)

|                     |     |                                                      |                                                     |     |
|---------------------|-----|------------------------------------------------------|-----------------------------------------------------|-----|
| DIP-001954p(HpDPH1) | 1   | -----MLSTLRSFELHKLGLTGSS-----NDSTTTTTTTTT            | AASAPQPKAQQQPAYPSEEDMARDRRRFPPLAATDTASPSPSAFA       | 84  |
| DIP-006271p         | 1   | MASALLSLPTAALSTILS--LVRLSSVSPSSTITTKNPSSNASATEET     | ATTPPPVPENSQR-----AGLRPTRLT                         | 71  |
| DIP-001954p(HpDPH1) | 85  | PEIHPAADRVSEVAEAFARLWPFGEAERRFRADFPVTCLYFPFHAR       | AERIGFACRLTLLFLVDDLLEEMGLEEGSAYNERLISISKGDEEPEPK    | 184 |
| DIP-006271p         | 72  | ARKHRLTEQTVQVNDFFLRNWPFKTDKRRRFPVDEGYAFFVCVLPESL     | DERIHWGCRLLTVGFLIDDLVDNMNVAEGAFAFNAAVVECCRGTLQLPDRV | 171 |
| DIP-001954p(HpDPH1) | 185 | PAEVLTRLEWDMRACDARLAGEIKEPVTFMRAQTDGSRILTRELGAIFY    | EYREKDVGQALLSALMRFSMALHLTPAQLRLAQLPERNCARHISVNDIY   | 284 |
| DIP-006271p         | 172 | PSQWIMYDLFAMRAVDRRLADELQPTIDFLLAQVDSRRRPMNLAEYF      | EYRDADLKGGLISGIMRFGGLSMTAELDVVRPVDENVMKHITFVNDVVC   | 271 |
| DIP-001954p(HpDPH1) | 285 | SWRKEVRASETLHEEGAALCSSVAFLAAEASVPASGARRVLWALCREWEA   | EHRMREGDLLRRLVEEEEEEGDQG-QQVLRVYVIRGLESQMSGNERWSEST | 383 |
| DIP-006271p         | 272 | SYEKERLAABEAGYELG-EICSSVPIVAAWLGVGEDDAKRVMMWQAARGWED | RHLAMKRDL-----AGPLGASSALRTRYLRWVEYQASGNELWSLLT      | 361 |
| DIP-001954p(HpDPH1) | 384 | PRYHKVK*----- 391                                    |                                                     |     |
| DIP-006271p         | 362 | PRYNRFALGFTEGRPEAQ* 381                              |                                                     |     |

Identity: 140/420 (33.3%) / Similarity: 207/420 (49.3%) / Gaps: 68/420 (16.2%)

|                      |     |                                                      |                                                    |     |
|----------------------|-----|------------------------------------------------------|----------------------------------------------------|-----|
| XP_023093357(AoDPH1) | 1   | MLQRLWALSTSA-----IKLFPQFSPFGAPRDLLIEKDRRSMPCLAKE     | ----APP-----PSAFSAIHPILSDSVSTEVNDIYFLQNWPFPR       | 76  |
| DIP-006271p          | 1   | MASALLSLPTAALSTILSLVRLS---SVVSPSSTITTKNPSSNASATEE    | TTATTPPPVPENSQRPAGLRTRLTARKHRLTEQTVQVNDFFLRNWPFK   | 96  |
| XP_023093357(AoDPH1) | 77  | TDNERARFHAAGFSRVTCLYFPFMMADDRIGFACRLTILFLIDDLLEEMS   | LDEGTYNEKLISIRGDVAPDRITPAQWIMYDLWDMRACDHVLADELL    | 176 |
| DIP-006271p          | 97  | TDKRRRFPVDEGYAFFVCVLPESLDERIHWGCRLLTVGFLIDDLVDNMN    | VAEGAFAFNAAVVECCRGTLQLPDRVPSQWIMYDLFAMRAVDRRLADELL | 196 |
| XP_023093357(AoDPH1) | 177 | EPVTFMRAQTDKTRLTTHQFGEYLDYREKDVGQAIKAQTKCIRSLLSGL    | QRYTMKLYLTEEDLRMAAPAERNCAKHIAILNDIYSWRKELLASKTLHHE | 276 |
| DIP-006271p          | 197 | QPTIDFLLAQVDSRRRPMNLAEYFEYRDADLG-----KGLISGI         | MRFCGGLSMTAELDVVRPVDENVMKHITFVNDVCSYEKERLAABEA-GYE | 285 |
| XP_023093357(AoDPH1) | 277 | GAAICSSVQLSEVTALSHAATQRLVLTMCREWESVHKQLVTEV-AGT--    | GSRLDLDYIHGLEFQMSGNERWSESTPRYHF*----- 355          |     |
| DIP-006271p          | 286 | LGEICSSVPIVAAWLGVGEDDAKRVMMWQAARGWEDRHLAMKRDLILAGPLG | ASSALRTRYLRWVEYQASGNELWSLLTPRYNRFALGFTEGRPEAQ* 381 |     |

Identity: 134/396 (33.8%) / Similarity: 205/396 (51.8%) / Gaps: 56/396 (14.1%)

**Figure S3. Alignment and homology of the amino acid sequences of the predicted sesquiterpene cyclases identified in *Hansfordia pulvinata* and *Aspergillus oryzae* genome sequences.**

Amino acid sequences of two candidates of *H. pulvinata* 414-3, DIP\_001954 (HpDph1) and DIP\_006271, and one of *A. oryzae* RIB40 XP\_023093357 (AoDph1) were compared.

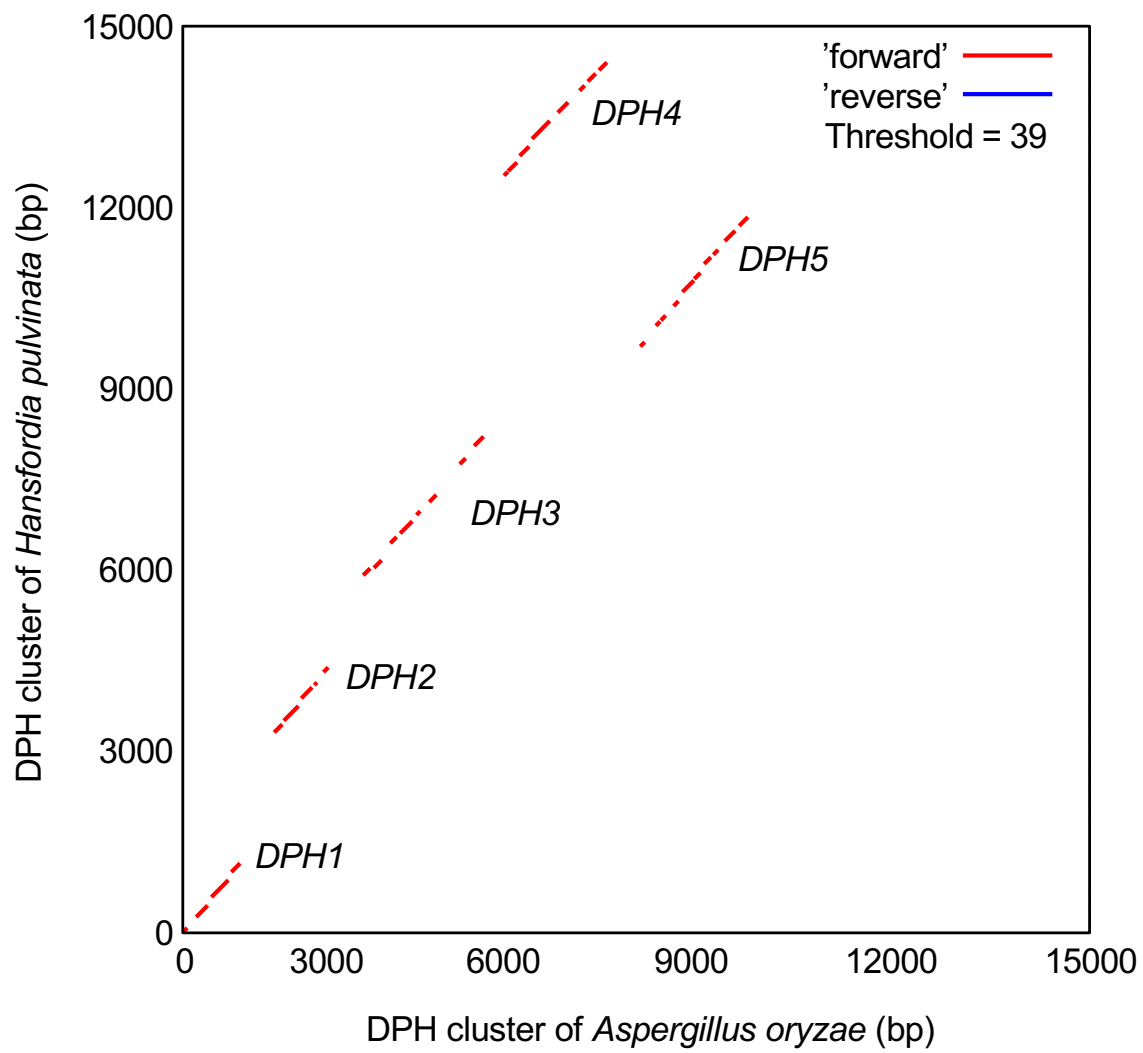

Figure S4. Dot plot analysis of the deoxyphomenone biosynthesis (*DPH*) gene clusters from *Hansfordia pulvinata* 414-3 and *Aspergillus oryzae* RIB40.

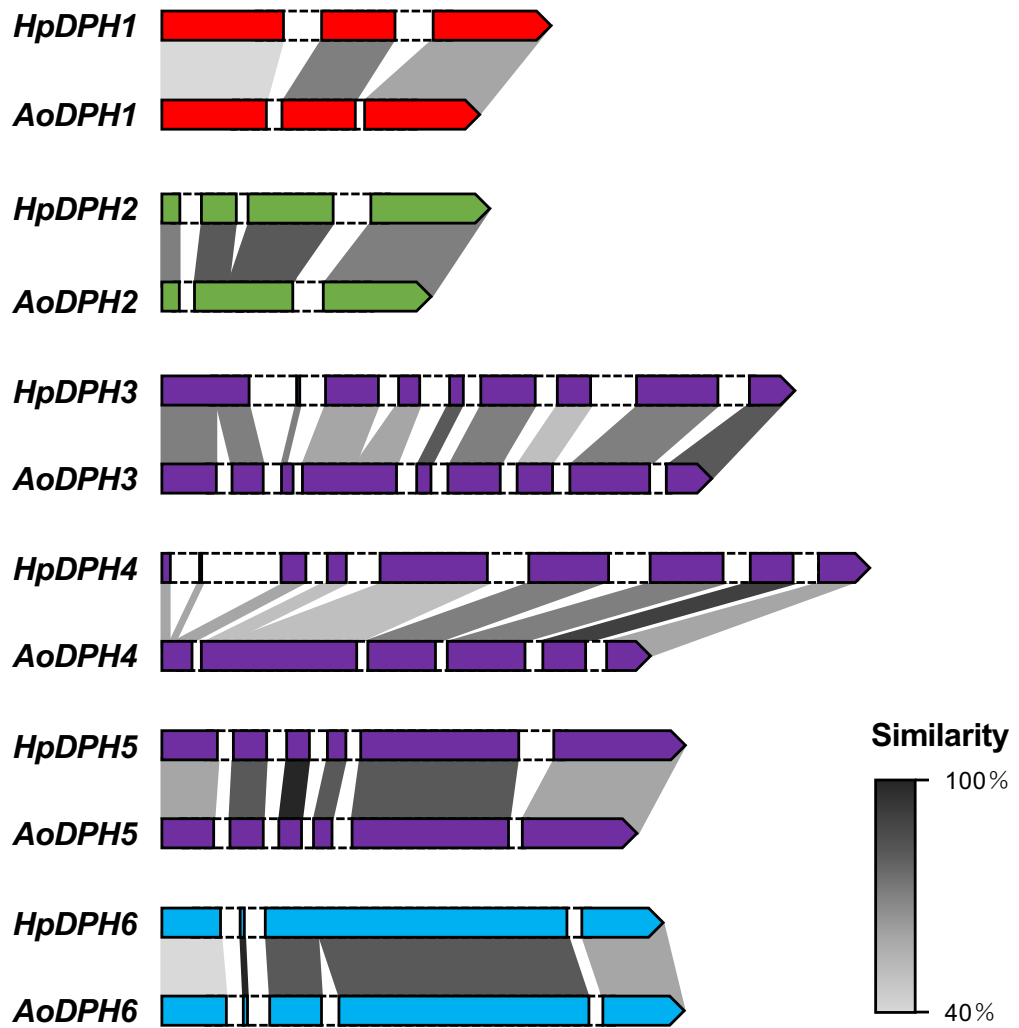

**Fig. S5. Exon-intron structures of deoxyphomenone biosynthetic (*DPH*) genes.**

Colored boxes: exon regions; boxes with dashed line: intron regions in *DPH* genes; gray shading: similarity of amino acid sequences.

```

H. pulvinata      MATEKHPA-----SLPGSQDAPFKTEAPPQGVVERSDAYSGDGEHGGSSITEN  TDADQKGGGLVLTVAALAMGMFLVSLDMTIVATAIPRITDEFPGQIELVGVWGAFFTT
A. oryzae        MSTKTRSSQTGETAVSSRISTPATLEKPNKDALPSH----DPQVMEVRNKEDSGSGVDDA  PTEEPSTGGFTLLMTVTALAMSMFLVSLDMTIVATAIPKITDEFPGGIEDEGWYGAFFIT
A. parvisclerotigenus  MSTKTRSSQTGETAVSSRISTPATLEKPNKDALPSH----DPQVMEVRNKEDSGSGVDDA  PTEEPSTGGFTLLMTVTALAMSMFLVSLDMTIVATAIPKITDEFPGGIEDEGWYGAFFIT
A. flavus        MSTKTRSSQTGETAVSSRISTPATLEKPNKDASPSH----DPQVMEVRNKEDSGSGVDDA  PTEEPSTGGFTLLMTVTALAMSMFLVSLDMTIVATAIPKITDEFPGGIEDEGWYGAFFIT
A. minisclerotigenes  MSTKTRSSHTGETAVSSRISTPATPEKPNKDASPSH----DPQVMEVRNKETGSGVDDA  PTDEPSTGGFTLFMTVTALAMSMFLVSLDMTIVATAIPKITDEFPGGIEDEGWYGAFFIT
A. caelatus      MSTKTRSSQTGETAVSSGTSTPATLEKSNKDVSPSH----ETPVVGDREKEERGSGVDDA  PTDKPSTGGFTFLMTVTALAMSMFLVSLDMTIVATAIPKITDEFPGGIEDEAWYGAFFIT
A. pseudocaelatus  MSTKTRSSQTGETAVSSGTSTHATLEKSNKDVSPSH----ETPVVGDREKEERGSGVDDA  PTDKPSTGGFTFLMTVTALAMSMFLVSLDMTIVATAIPKITDEFPGGIEDEAWYGAFFIT
*:*:..:..:      * .: .: * *: .: .: .: * *: .: .: * *:..:..:*****:*****:***** * .*:*:..:..:

H. pulvinata      LGGFQAANGKAYKYPFLKIFLFLSIFLFEVGLICGVAPNSLTLIVGRAITGVGGVSC  GCFIIALSAPPKQPAYIGILGASYGIAAAIGPLVGGAFDCKVTRWCFYINLPIGAVT
A. oryzae        LGSFQAANGKAYKYPFLKTSFLLSIFLFEVGLICGVAPNSLALCIGRAITGVGGAGISS  GAFTIIALSAPPKQRPAYIGILGASYGVAAGIPLVGGAFDCKVTRWCFYINLPIGGLA
A. parvisclerotigenus  LGSFQAANGKAYKYPFLKTSFLLSIFLFEVGLICGVAPNSLALCIGRAITGVGGAGISS  GAFTIIALSAPPKQRPAYIGILGASYGVAAGIPLVGGAFDCKVTRWCFYINLPIGGLA
A. flavus        LGSFQAANGKAYKYPFLKTSFLLSIFLFEVGLICGVAPNSLALCIGRAITGVGGAGISS  GAFTIIALSAPPKQRPAYIGILGASYGVAAGIPLVGGAFDCKVTRWCFYINLPIGGLA
A. minisclerotigenes  LGSFQAANGKAYKYPFLKTSFLLSIFLFEVGLICGVAPNSLALCIGRAITGVGGAGISS  GAFTIIALSAPPKQRPAYIGILGASYGVAAGIPLVGGAFDCKVTRWCFYINLPIGGLA
A. caelatus      LGSFQAANGKAYKYPFLKISFLLSIFLFEIGSLICGVAPNSIALCIGRAITGVGGAGISS  GAFTIIALSAPPKQRPAYIGILGASYGVAAGIPLVGGAFDCKVTRWCFYINLPIGGLA
A. pseudocaelatus  LGSFQAANGKAYKYPFLKISFLLSIFLFEIGSLICGVAPNSIALCIGRAITGVGGAGISS  GAFTIIALSAPPKQRPAYIGILGASYGVAAGIPLVGGAFDCKVTRWCFYINLPIGGLA
*:*****:..:..: * .*:*:..:..: * .*:*:..:..: * .*:*:..:..: * .*:*:..:..: * .*:*:..:..: * .*:*:..:..: * .*:*:..:..:

H. pulvinata      VAVIAFFYKPPPLPFLDTPLEKREKLLQMDLPGTLLVSAALVCFVLSLQWAGVSRPWSST  VIGTLVGFVLLIAYAVVQWLQGPRAAMVGHLLQRNVVIAMVYIHLIAGSFFLLVYVLP
A. oryzae        AGIILFFYRPPPLPFLDTPLEKREKLLQMDLPGTLLVSAALVCFVLSLQWAGVSRPWSST  VIGTLVGFVLLIAYAVVQWLQGPRAAMVGHLLQRNVVIAMVYIHLIAGSFFLLVYVLP
A. parvisclerotigenus  AGIILFFYRPPPLPFLDTPLEKREKLLQMDLPGTLLVSAALVCFVLSLQWAGVSRPWSST  VIGTLVGFVLLIAYAVVQWLQGPRAAMVGHLLQRNVVIAMVYIHLIAGSFFLLVYVLP
A. flavus        AGIILFFYRPPPLPFLDTPLEKREKLLQMDLPGTLLVSAALVCFVLSLQWAGVSRPWSST  VIGTLVGFVLLIAYAVVQWLQGPRAAMVGHLLQRNVVIAMVYIHLIAGSFFLLVYVLP
A. minisclerotigenes  AGIILFFYRPPPLPFLDTPLEKREKLLQMDLPGTLLVSAALVCFVLSLQWAGVSRPWSST  VIGTLVGFVLLIAYAVVQWLQGPRAAMVGHLLQRNVVIAMVYIHLIAGSFFLLVYVLP
A. caelatus      GGIILFFYRPPPLPFLDTPLEKREKLLQMDLPGTLLVSAALVCFVLSLQWAGVSRPWSST  VIGTLVGFVLLIAYAVVQWLQGPRAAMVGHLLQRNVVIAMVYIHLIAGSFFLLVYVLP
A. pseudocaelatus  GGIILFFYRPPPLPFLDTPLEKREKLLQMDLPGTLLVSAALVCFVLSLQWAGVSRPWSST  VIGTLVGFVLLIAYAVVQWLQGPRAAMVGHLLQRNVVIAMVYIHLIAGSFFLLVYVLP
.:* **:*****: * : * **:*****: * **:*****: * **:*****: * **:*****: * **:*****: * **:*****: * **:*****: * **:*****:

H. pulvinata      YFQVNVGSAAQSGIRNLPILILAQSVFATISGVLLSKFERPQPFLLIAGATLVTISSGLLY  TLDVDEPGKWIQYQLLAGVGVGCFQVFPVTTAQSVAPEDLPSVTAMVLTVQTLGGSVF
A. oryzae        YFQVNVGSAAQSGIRNLPILILAQSVSTVIGSVTLKSKFGYPPFLLVGGVLTAVGSGGLLY  TLEVNTGSGKWIQYQLLAGIIGWCFQIPVTTAQSVAPEDLPSVTAMVLTVQTLGGSVF
A. parvisclerotigenus  YFQVNVGSAAQSGIRNLPILILAQSVSTVIGSVTLKSKFGYPPFLLVGGVLTAVGSGGLLY  TLEVNTGSGKWIQYQLLAGIIGWCFQIPVTTAQSVAPEDLPSVTAMVLTVQTLGGSVF
A. flavus        YFQVNVGSAAQSGIRNLPILILAQSVSTVIGSVTLKSKFGYPPFLLVGGVLTAVGSGGLLY  TLEVNTGSGKWIQYQLLAGIIGWCFQIPVTTAQSVAPEDLPSVTAMVLTVQTLGGSVF
A. minisclerotigenes  YFQVNVGSAAQSGIRNLPILILAQSVSTVIGSVTLKSKFGYPPFLLVGGVLTAVGSGGLLY  TLEVNTGSGKWIQYQLLAGIIGWCFQIPVTTAQSVAPEDLPSVTAMVLTVQTLGGSVF
A. caelatus      YFQVNVGSAAQSGIRNLPILILAQSVSTVIGSVTLKSKFGYPPFLLVGGVLTAVGSGGLLY  TLEVNTGSGKWIQYQLLAGIIGWCFQIPVTTAQSVAPEDLPSVTAMVLTVQTLGGSVF
A. pseudocaelatus  YFQVNVGSAAQSGIRNLPILILAQSVSTVIGSVTLKSKFGYPPFLLVGGVLTAVGSGGLLY  TLEVNTGSGKWIQYQLLAGIIGWCFQIPVTTAQSVAPEDLPSVTAMVLTVQTLGGSVF
*****:*****:..:..: * .*:*:..:..: * .*:*:..:..: * .*:*:..:..: * .*:*:..:..: * .*:*:..:..: * .*:*:..:..: * .*:*:..:..:

H. pulvinata      VSAGQSALVNI LFKSLPAGFSDSDAAAVANTAGEKRETVSPEHFPVLRAYMDGIRGAL  LIAVVASGLAFVASLLLRSTKLRGNSAAAAV
A. oryzae        VSAGQSAMVNVLLKLNLRSETSTVDVAVKAMTGATELRQKRFSSAQMPFILTAYMNGLQAAF  LVAVVASSVATVVCCLATRWIKFSGQTTAVAAA
A. parvisclerotigenus  VSAGQSAMVNVLLKLNLRSETSTVDVAVKAMTGATELRQKRFSSAQMPFILTAYMNGLQAAF  LVAVVASSVATVVCCLATRWIKFSGQTTAVAAA
A. flavus        VSAGQSAMVNVLLKLNLRSETSTVDVAVKAMTGATELRQKRFSSAQMPFILTAYMNGLQAAF  LVAVVASSVATVVCCLATRWIKFSGQTTAVAAA
A. minisclerotigenes  VSAGQSAMVNVLLKLNLRSETSTVDVAVKAMTGATELRQKRFSSAQMPFILTAYMNGLQAAF  LVAVVASSVATVVCCLATRWIKFSGQTTAVAAA
A. caelatus      VSAGQSAMVNVLLKLNLRSETSTVDVAVKAMTGATELRQKRFSSAQMPFILTAYMNGLQAAF  LVAVVASSVATVVCCLATRWIKFSGQTTAVAAA
A. pseudocaelatus  VSAGQSAMVNVLLKLNLRSETSTVDVAVKAMTGATELRQKRFSSAQMPFILTAYMNGLQAAF  LVAVVASSVATVVCCLATRWIKFSGQTTAVAAA
*****:*****:..:..: * .*:*:..:..: * .*:*:..:..: * .*:*:..:..: * .*:*:..:..: * .*:*:..:..: * .*:*:..:..: * .*:*:..:..:

```

**Figure S6. Alignment of deduced amino acid sequences of *HpDPH6* homologs from *Hansfordia pulvinata* and six *Aspergillus* species.** The substrate binding pocket conserved in the transporters of the major facilitator superfamily is indicated in bold. Accession numbers and sequences are listed in Supplementary Table S2.

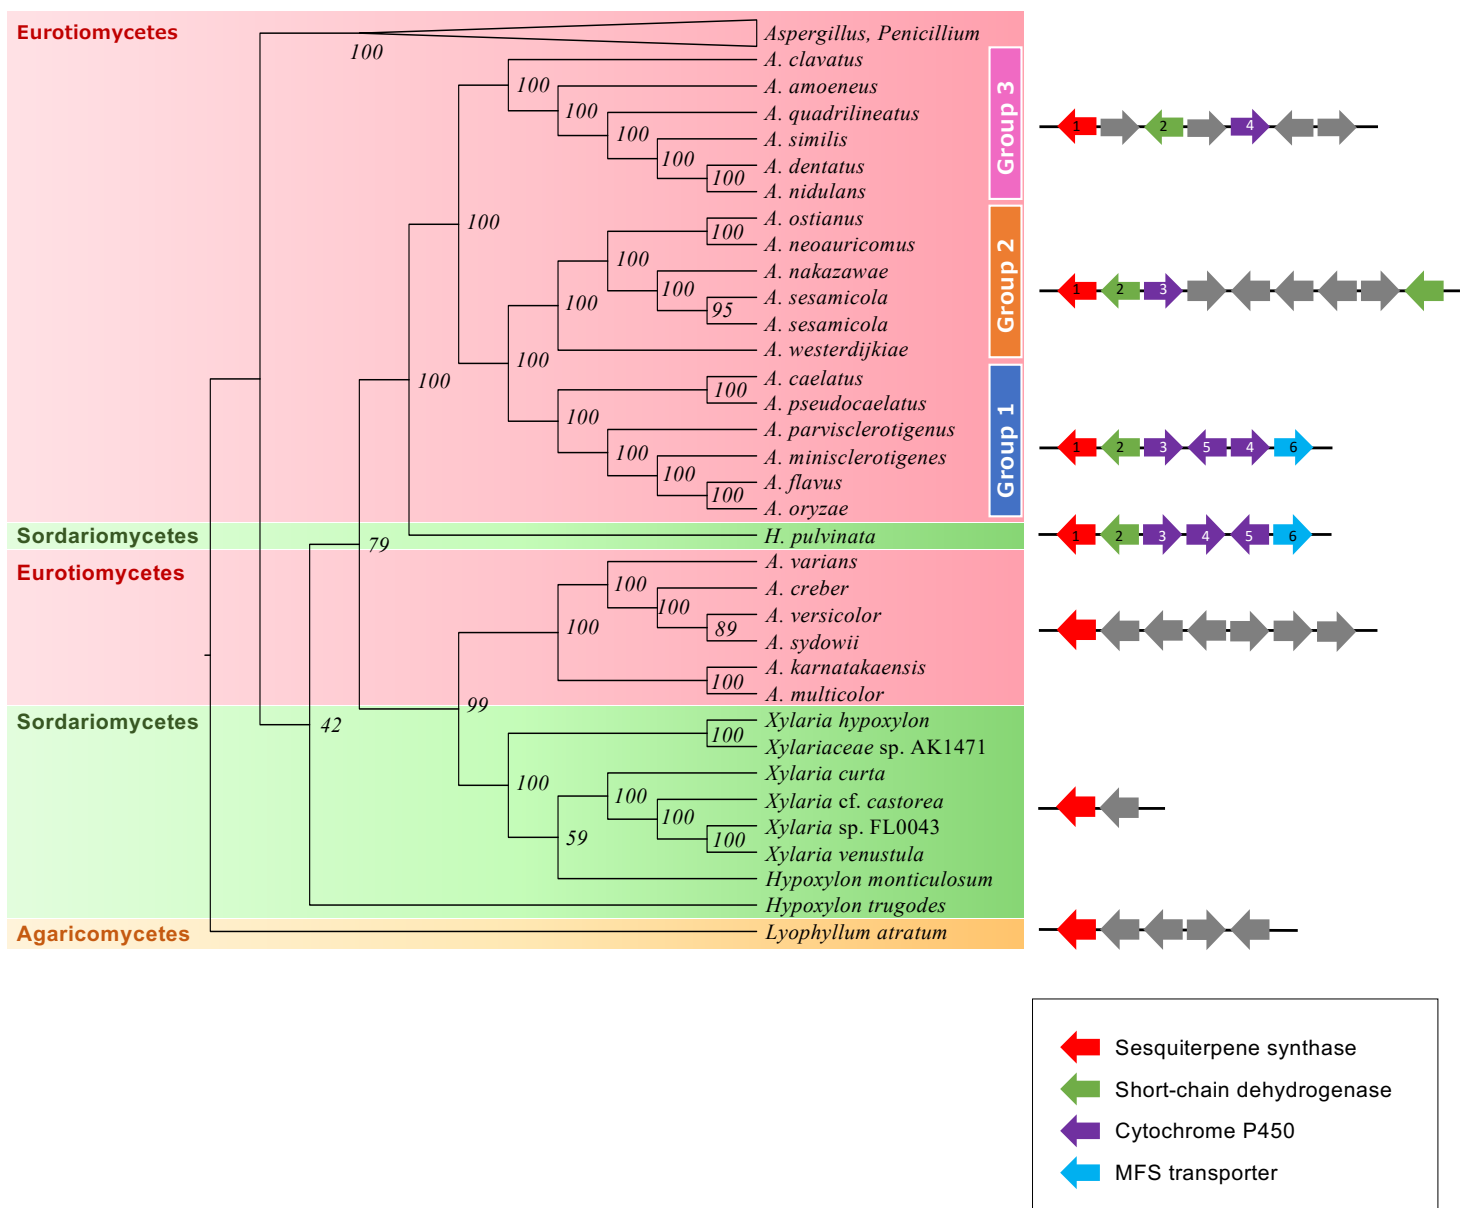

**Figure S7. Phylogenetic analysis of genomic sequences containing *HpDPH1* homologous genes and the upstream region using the maximum likelihood method.**

The 60 fungal genome sequences (approximately 15 kb) used in the phylogenetic analysis are listed in Supplementary Table S1. Numbers at branches represent bootstrap percentages (1000 replicates). The sequence of *Lyophyllum atratum* belonging to *Agaricomycetes* was used as an outgroup. Schematic diagrams of genomic structures on the right indicate gene orientation with annotation information in color; numbers in the arrows indicate genes that are more than 50% homologous to HpDph1 to HpDph6 proteins of *H. pulvinata*.

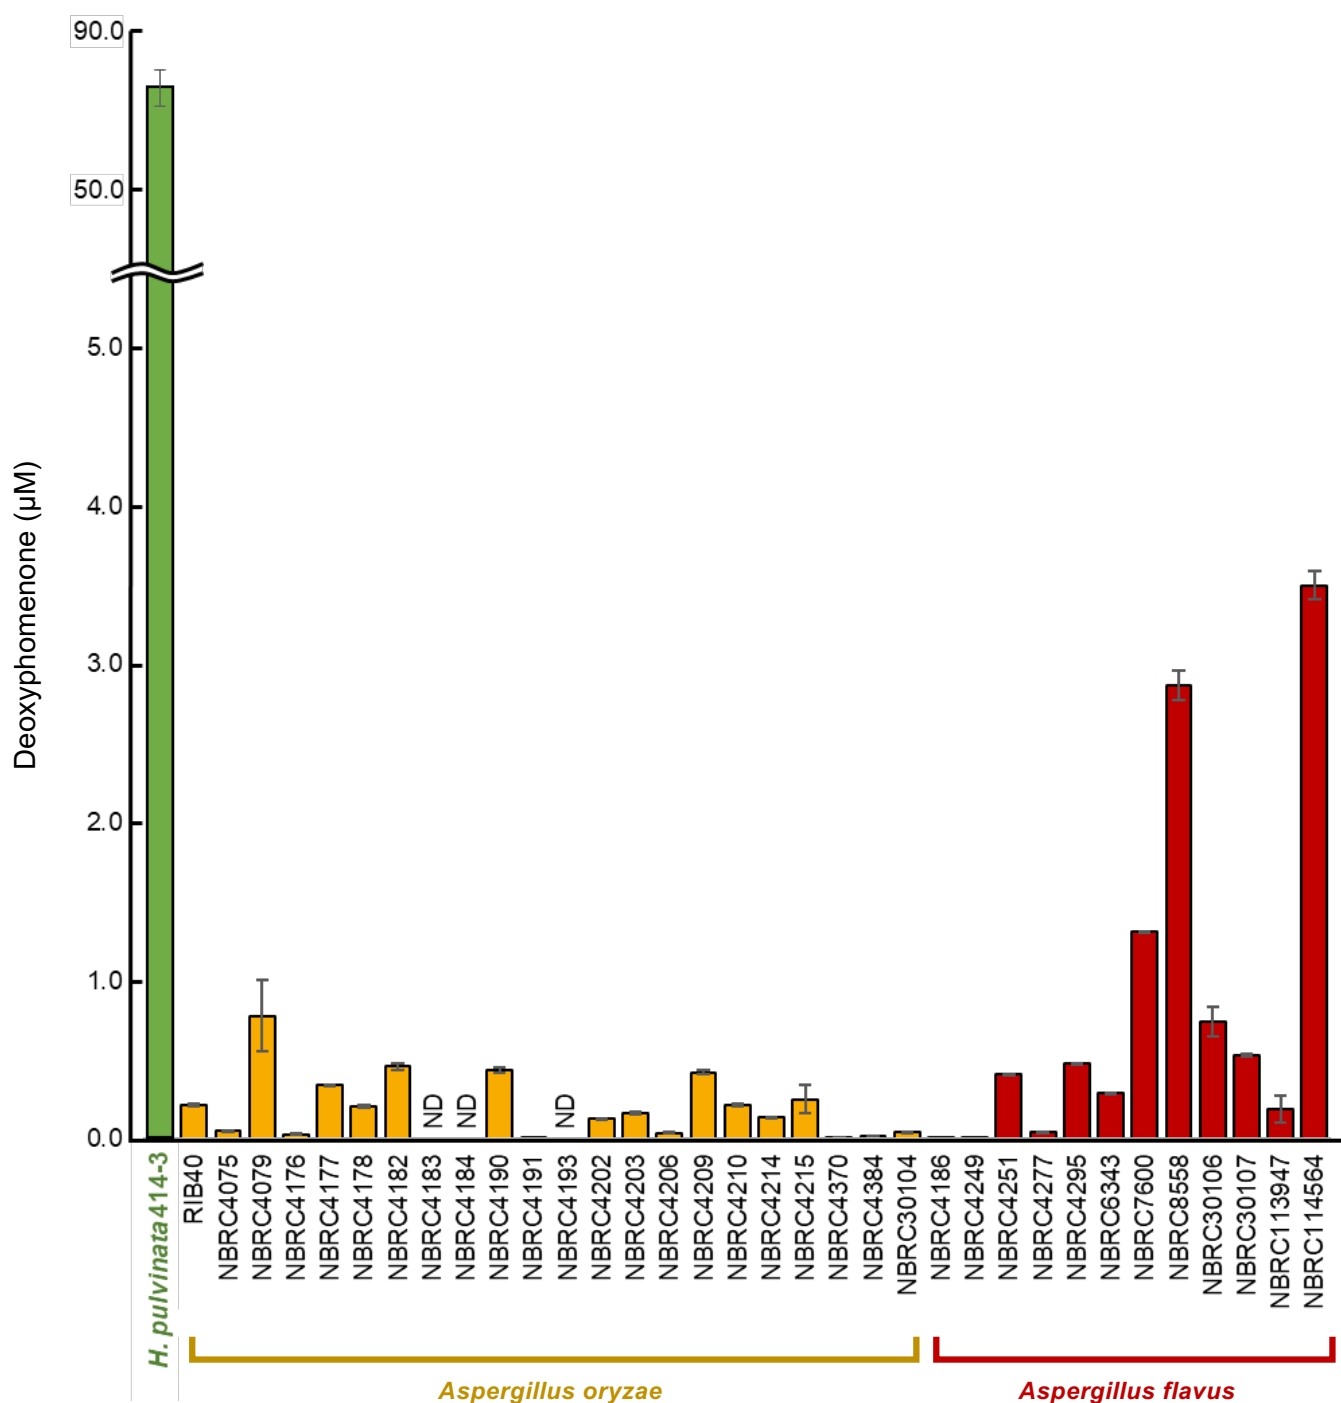

**Figure S8. Deoxyphomenone produced by *Hansfordia pulvinata* 414-3 and strains of *Aspergillus oryzae* and *A. flavus*.**

Strains were cultured in MM broth at 25 °C. Deoxyphomenone in the culture filtrate was quantified using LC-MS/MS. Values are the means of three replicates ( $\pm$  SD). ND, not detected.



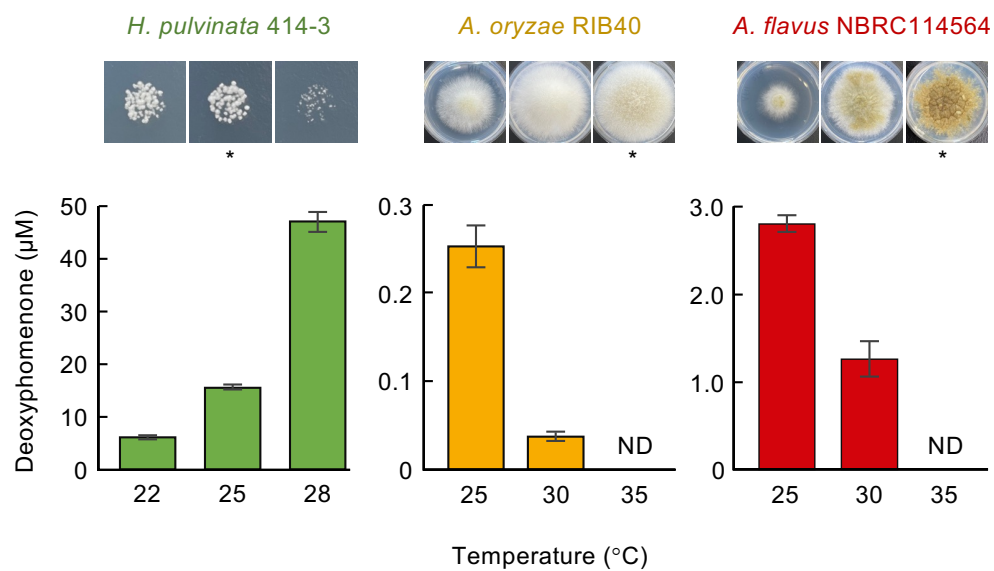

**Figure S9. Deoxyphomenone production by *Hansfordia pulvinata* 414-3, *Aspergillus oryzae* RIB40 and *A. flavus* NBRC114564 on MM agar or in broth at different temperatures.**

Deoxyphomenone in the culture filtrate of the broth was quantified by LC-MS/MS. The optimum temperature for growth on agar is indicated by the asterisk. Values are the means of three replicates ( $\pm$  SD). ND, not detected.

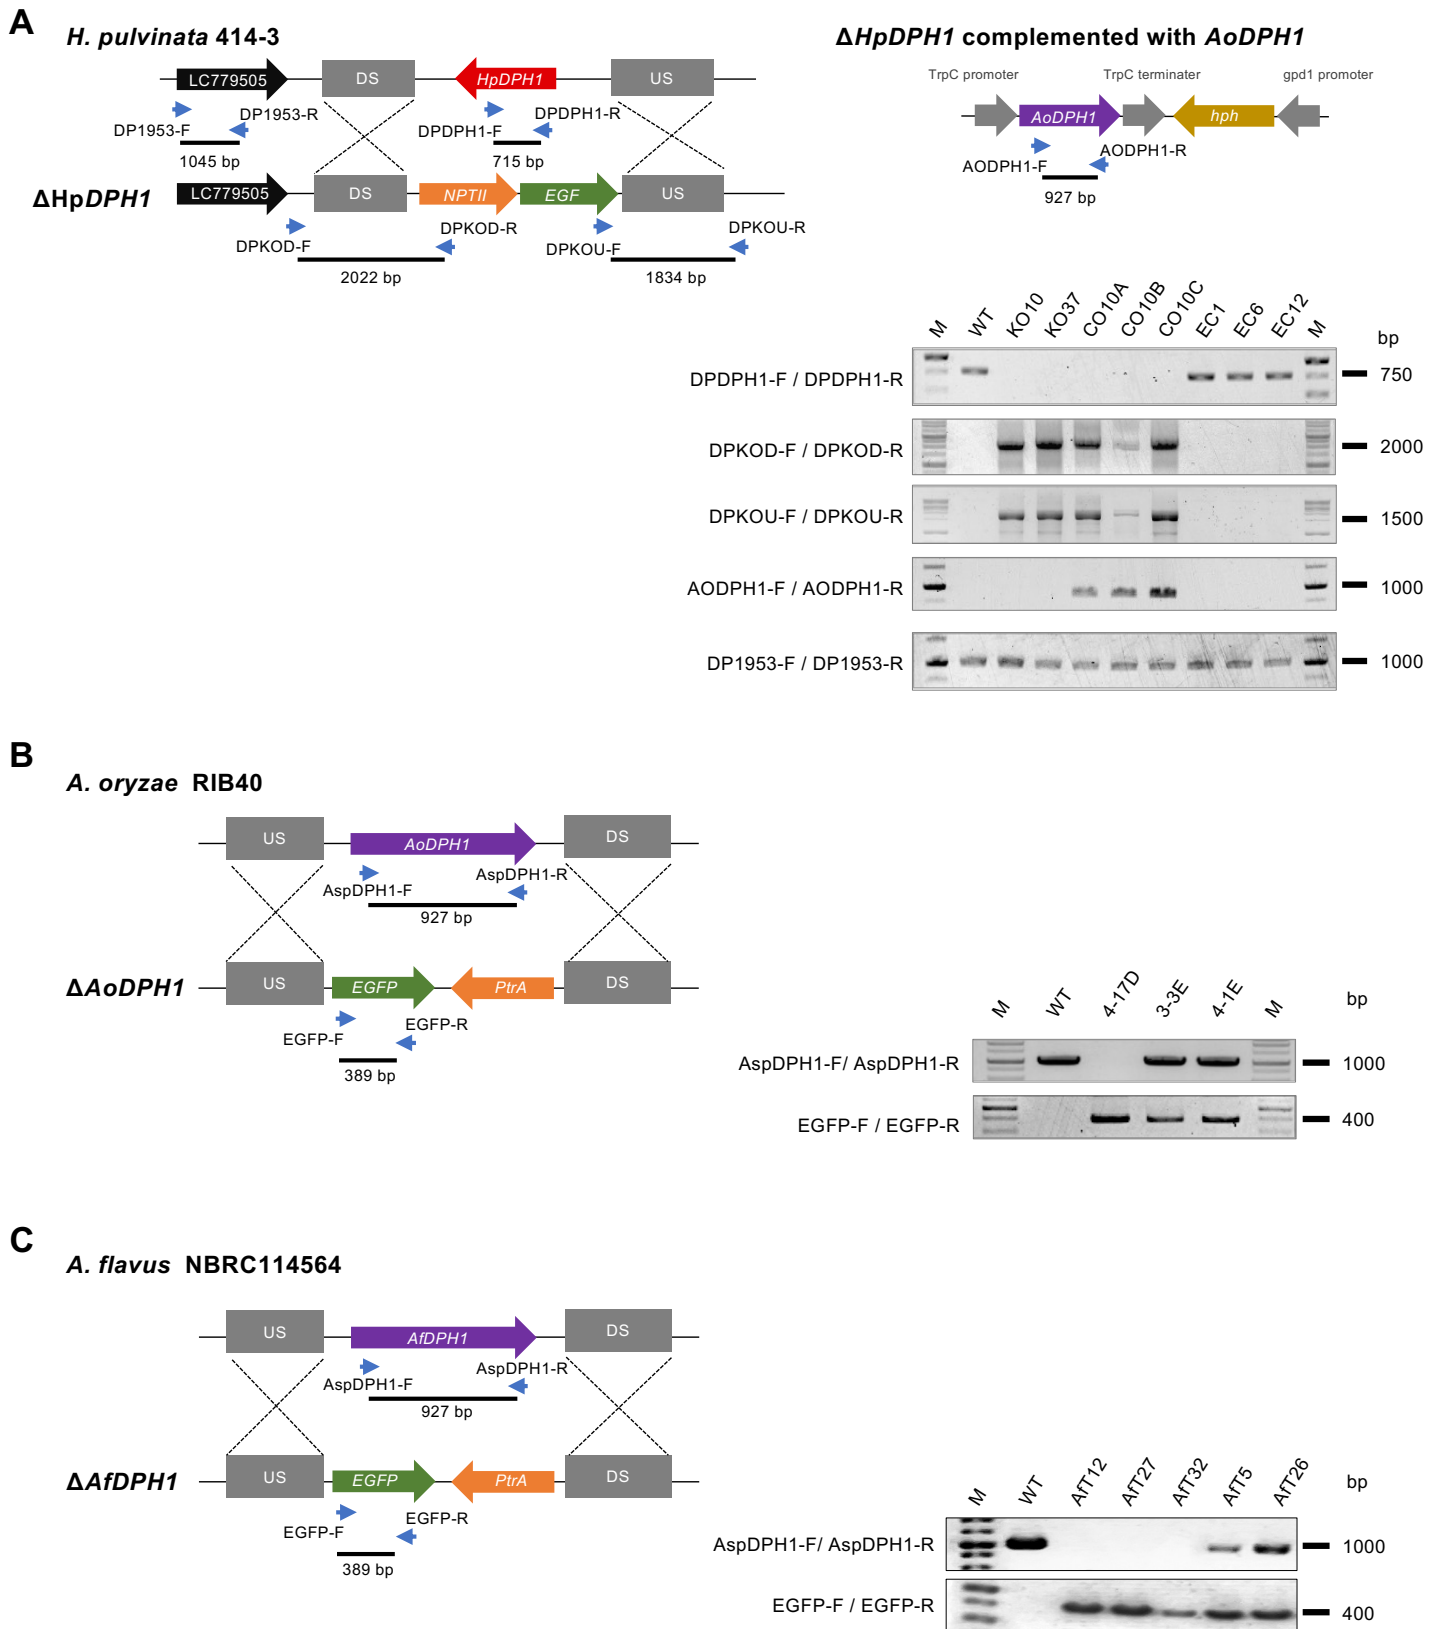

**Figure S10. PCR detection of the inserted cassettes in transformants and wild-type strains.**

Representation of the locus of *HpDPH1* homologous genes in wild-type strains of *Hansfordia pulvinata* 414-3 (A), *Aspergillus oryzae* RIB40 (B), *A. flavus* NBRC114564 (C) and transformants. Target genes were replaced by homologous recombination of the downstream (DS) and upstream (US) regions. *HpDPH1* knock-out mutant strain KO10 of *H. pulvinata* was complemented with functional *AoDPH1*. Large arrows: gene sequence; small blue arrows: primer sequence. The expected sizes of the amplicons are indicated under the primers. Each amplicon is shown on the right.

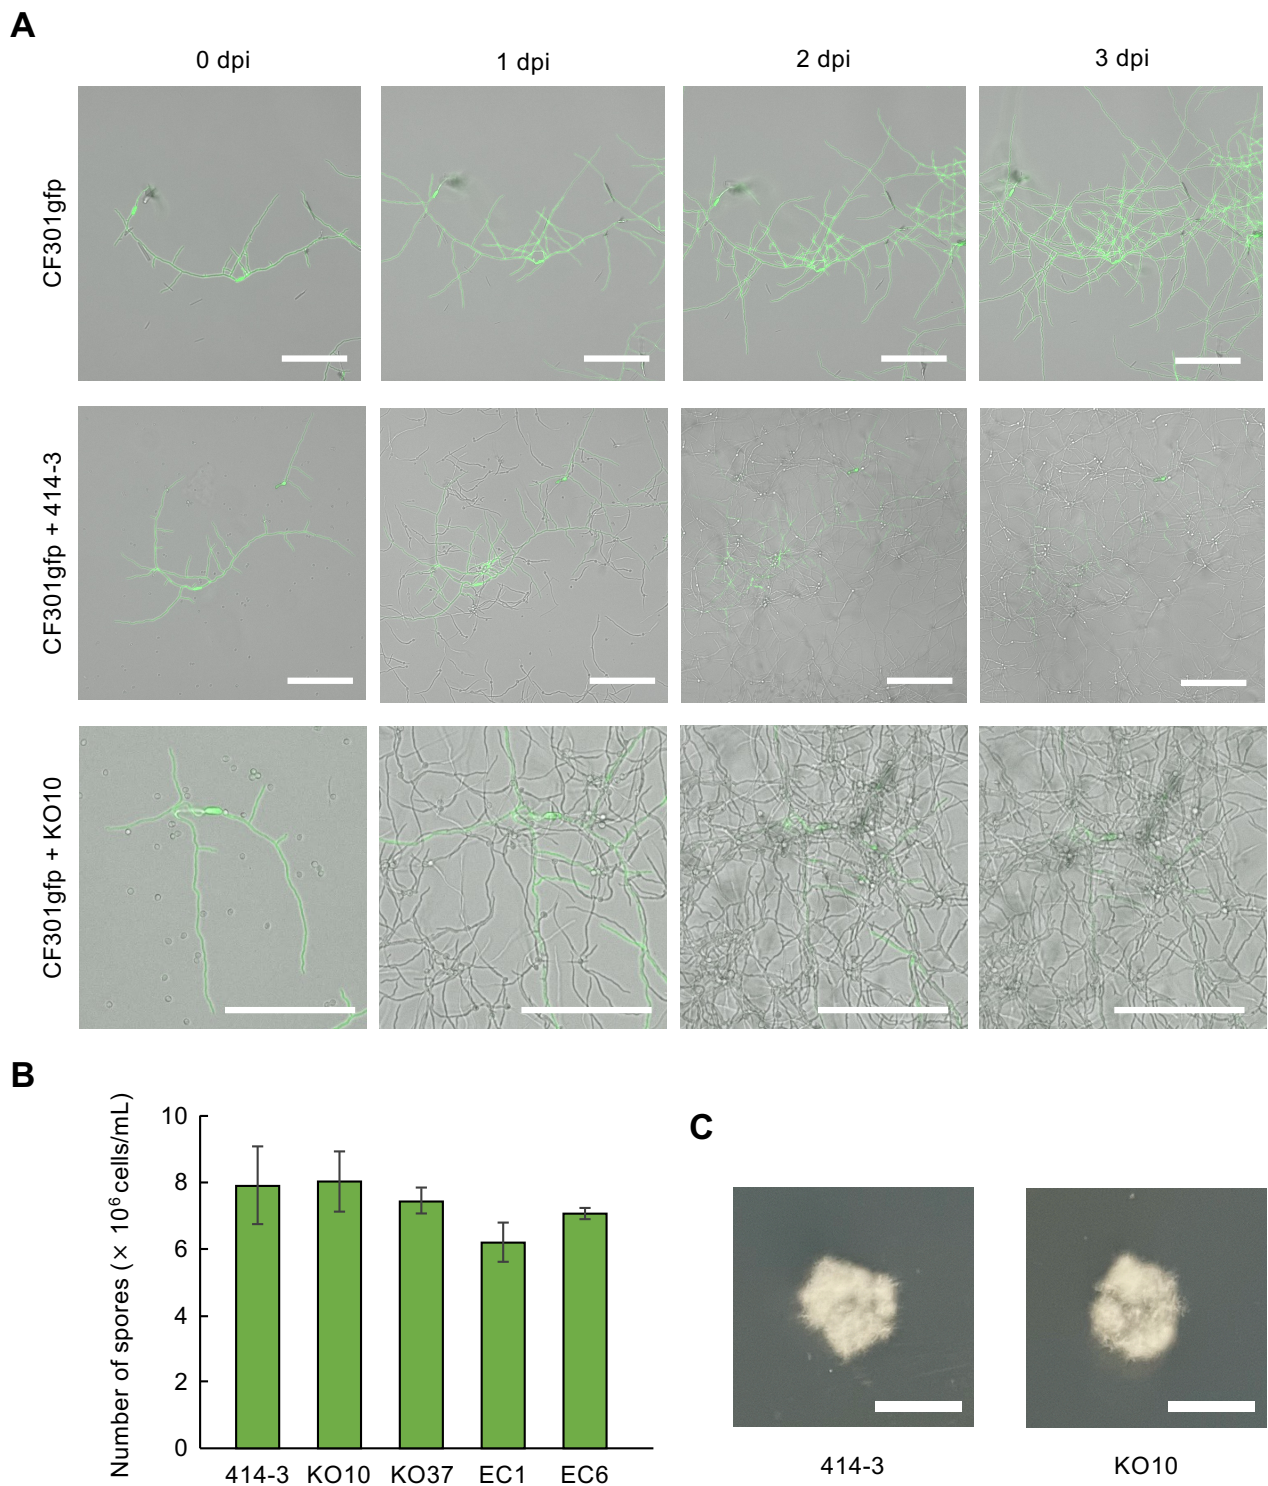

**Figure S11. *In vitro* assay of *Hansfordia pulvinata* mycoparasitic activity against GFP-expressing *Cladosporium fulvum*.**

(A) *H. pulvinata* wild-type 414-3 or  $\Delta HpDPH1$  mutant strain KO10 were cocultured with *C. fulvum* CF301gfp, which constitutively expresses GFP, in MM broth without a carbon source at 25 °C. The parasitized *C. fulvum* cells lost GFP fluorescence. Bars indicate 100  $\mu$ m. (B) Number of spores of 414-3,  $\Delta HpDPH1$  mutants (KO10 and KO37) and ectopic strains (EC01 and EC06). Values are means of three biological replicates. Error bars indicate the standard deviation. (C) Mycelial growth of *H. pulvinata* 414-3 and KO10 strains on PDA.

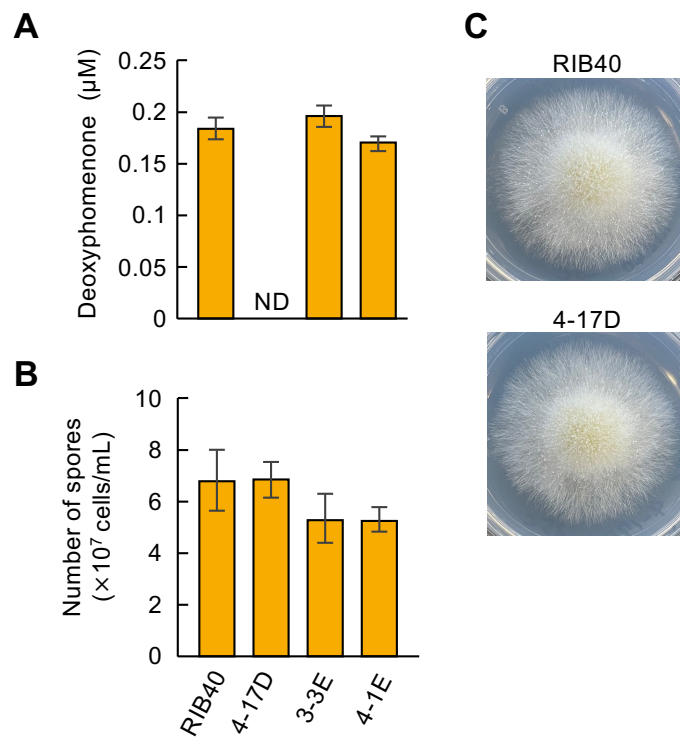

**Figure S12. Deoxyphomenone production and sporulation of *A. oryzae* RIB40 and transformants.**

Wild-type RIB40,  $\Delta A o D P H I$  mutant 4-17D, and ectopic strains 3-3E and 4-1E were cultured in MM broth or agar. Values in A and B are means of three replicates. Error bars indicate the standard deviation. (A) LC-MS/MS quantification of deoxyphomenone in culture filtrates. ND, not detected. (B) Number of spores formed on agar. (C) Colony morphology of wild-type RIB40 and  $\Delta A o D P H I$  mutant 4-17D on MM agar 25°C.

**A**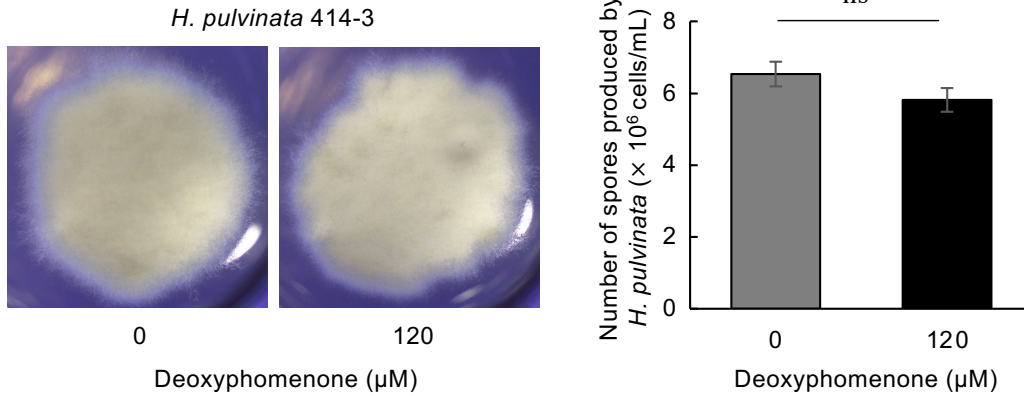**B**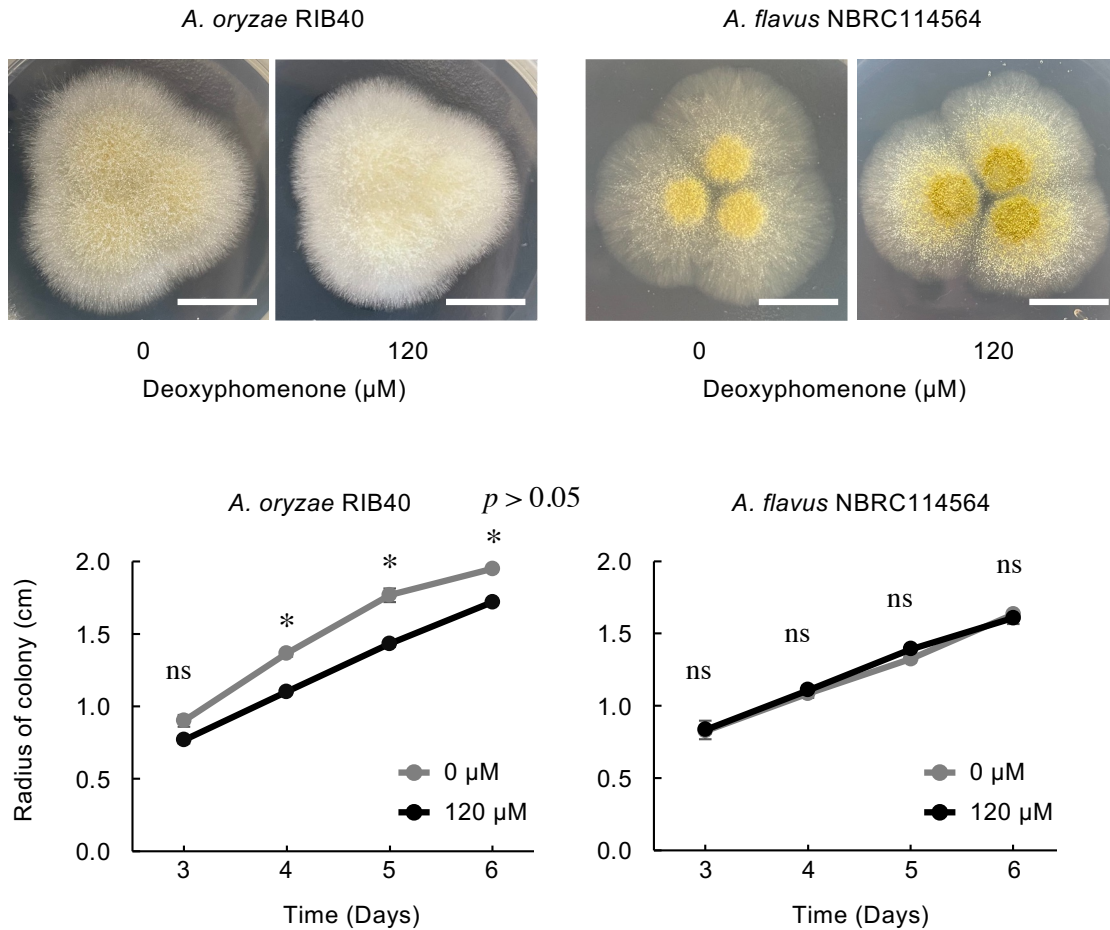

**Figure S13. Effect of deoxyphomenone on mycelial growth of *Hansfordia pulvinata*, *Aspergillus oryzae* and *A. flavus*.** Strains were grown on MM agar with 1% methanol (0 μM) or 120 μM deoxyphomenone. Values are means of three biological replicates (± SD). Means were compared for significant differences amount treatments using Tukey's test. ns, no significance. (A) Colony morphology and number of spores produced by *H. pulvinata* 414-3. (B) Colony of *A. oryzae* RIB40 and *A. flavus* NBRC114564. Bars = 1 cm. Fewer ocherous spores were produced by RIB40 in the presence of deoxyphomenone but more were produced by NBRC114564.

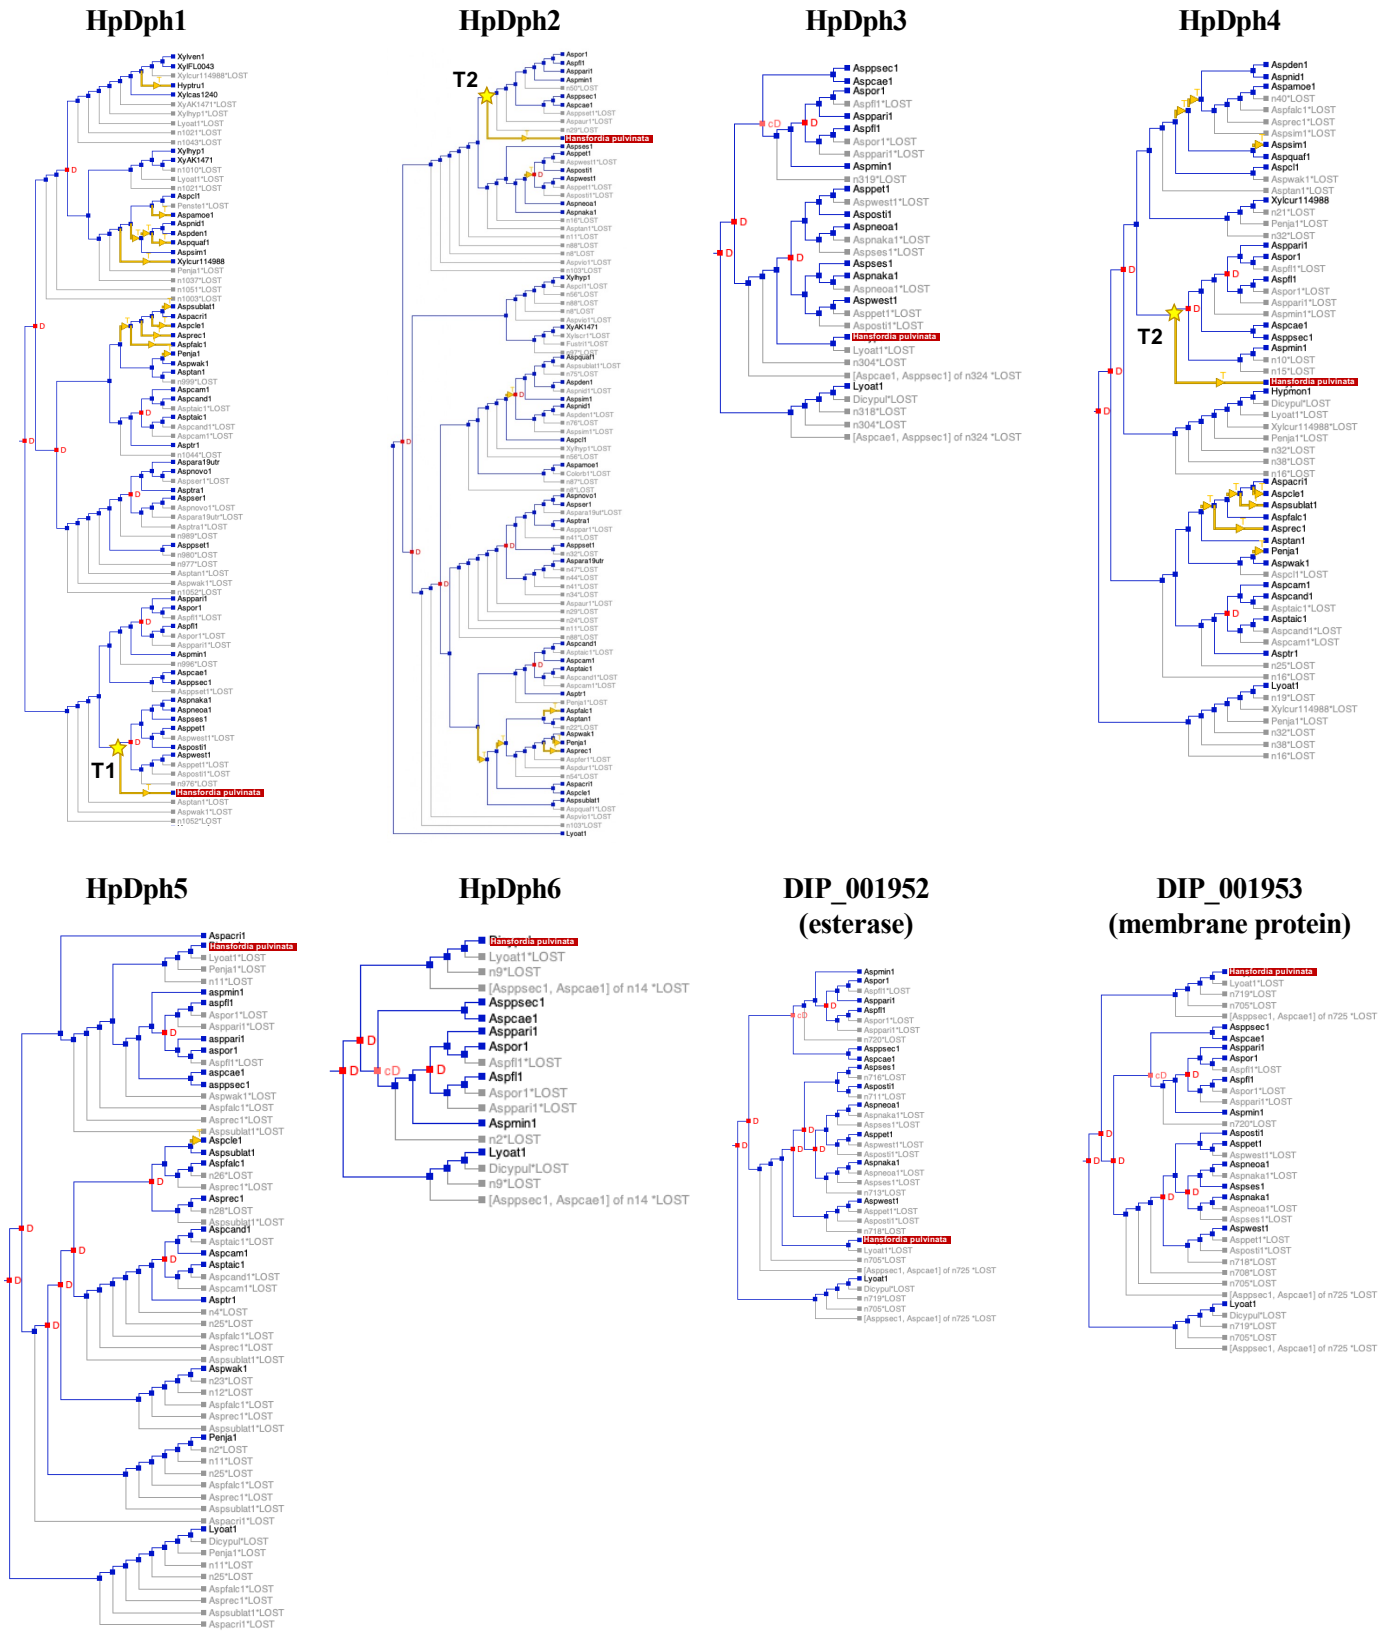

**Figure S14. Reconciliation of gene trees with species tree based on DPH nucleotide and amino acid sequences.** Phylogenetic protein trees were compared with the species tree using NOTUNG v.2.9 to infer duplications, losses, and horizontal transfer events for the HpDPH amino acid sequences. Duplication nodes are marked by red squares with a red D; losses are in grey; migrations are indicated with yellow arrows. Horizontal gene transfer events for the HpDph1 (T1) and HpDph2/HpDph4 (T2) proteins are indicated by yellow stars. *Hansfordia pulvinata* is highlighted by a red box. Event scores were calculated as total cost of duplications, transfers and losses. Costs/weights were set as duplications (D), 1.5; transfers (T), 8.0; losses (L), 1.0 (ratio D:T:L is 1:5.3:0.67).

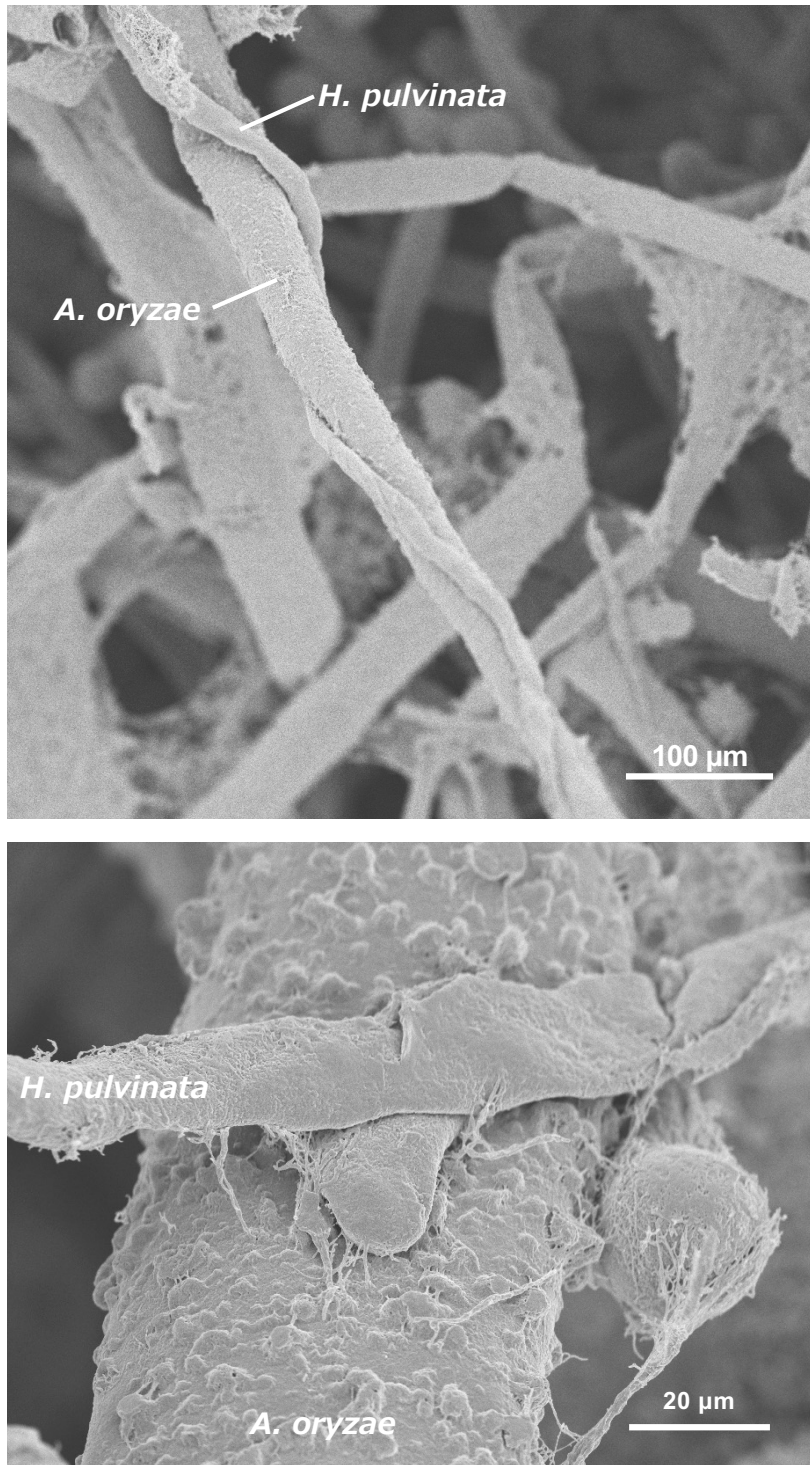

**Figure S15. Hyphal contact between the mycoparasite *Hansfordia pulvinata* 414-3 and *Aspergillus oryzae* RIB40.**  
Coiling of hyphae of 414-3 around the thick, rough hyphae of RIB40 was rarely found.

Supplemental table S1. Fungal genomic sequences used in this study

| Species name <sup>a</sup>                                         | Abbreviation name in JGI | Class (kingdom)              | Database                   | Nucleotide sequence                                            |
|-------------------------------------------------------------------|--------------------------|------------------------------|----------------------------|----------------------------------------------------------------|
| * <i>Hansfordia pulvinata</i> 414-3                               | -                        | Sordariomycetes (Ascomycota) | NCBI (ncbi.nlm.nih.gov)    | TCACCTTGACCTTGTGGTACCGCGCGTGGACTCGCTCCACCTCTCGTTGCCGCTCATCTG   |
| * <i>Aspergillus acristatulus</i> CBS 119.55 v1.0                 | Aspacr1                  | Eurotiomycetes (Ascomycota)  | JGI (mycocosm.jgi.doe.gov) | CTAGCGCTGATTCGGCGAGTTGTAGCGTGGGTCGCAGACTCCATAACTCATTTCCACT     |
| * <i>Aspergillus amoeneus</i> CBS 111.32 v1.0                     | Aspamoel                 | Eurotiomycetes (Ascomycota)  | JGI (mycocosm.jgi.doe.gov) | CTACCGCTGGCGGTTGCCCTTTTTCAACATAACCGCAGGGTCTGACGACTCCACAGCTC    |
| * <i>Aspergillus arachidicola</i> v1.0                            | Aspara19utr              | Eurotiomycetes (Ascomycota)  | JGI (mycocosm.jgi.doe.gov) | CTAGGCGACTCAGCGGAAATTGTATCGCAAAAGTAGTACACTCCACAGCTCAATCCACT    |
| * <i>Aspergillus caelatus</i> CBS 763.97 v1.0                     | Aspcae1                  | Eurotiomycetes (Ascomycota)  | JGI (mycocosm.jgi.doe.gov) | CTAAAAATGATAACGAGAAGTTGATTCACTCCAGCGCTCATTTCCGCTCATCTGAAACT    |
| * <i>Aspergillus campestris</i> IBT 28561 v1.0                    | Aspcaem1                 | Eurotiomycetes (Ascomycota)  | JGI (mycocosm.jgi.doe.gov) | GTTATATCGAAGAGTAGTCAAACCTCCAACTCATTTCCACTAAATTTGTAATCCAAACC    |
| * <i>Aspergillus candidus</i> CBS 102.13 v1.0                     | Aspcaand1                | Eurotiomycetes (Ascomycota)  | JGI (mycocosm.jgi.doe.gov) | CTAGTTAGCGGAGTTATAGCGAAGAGTAGTCAAACCTCCAACTCATTTCCACTAAATCT    |
| * <i>Aspergillus clavatus</i> NRRL 1 from AspGD                   | Aspcl1                   | Eurotiomycetes (Ascomycota)  | JGI (mycocosm.jgi.doe.gov) | CTACGCACTAGCGGTGCTCTTTTTCAACATAGCGCAGGGTTGTCGACTCCACAGCTC      |
| * <i>Aspergillus cleistominutus</i> CBS 200.75 v1.0               | Aspcele1                 | Eurotiomycetes (Ascomycota)  | JGI (mycocosm.jgi.doe.gov) | CTAGCGCTGATTCGGCGAGTTGTAGCGTGTAGTCTCAGACTCCATAACTCATTTCCACT    |
| * <i>Aspergillus creber</i> IBT 32277 v1.0                        | Aspcreb1                 | Eurotiomycetes (Ascomycota)  | JGI (mycocosm.jgi.doe.gov) | TAAATATCTTATACCGGCTTGTGTGCCGGACACTGCTCATTTCCACTTGCCATATAT      |
| * <i>Aspergillus dentatus</i> CBS 114.63 v1.0                     | Aspden1                  | Eurotiomycetes (Ascomycota)  | JGI (mycocosm.jgi.doe.gov) | CTACGCGCTAGCGGTTGCCTCTTTTTCAACATAGCGCAGGGTCTGACGACTCCACCGCTC   |
| * <i>Aspergillus falconensis</i> CBS 271.91 v1.0                  | Aspfal1                  | Eurotiomycetes (Ascomycota)  | JGI (mycocosm.jgi.doe.gov) | GGAAAGACGATAACAATCTATCATTCCATAGCGGCACTTCTAGCCTGTATTCGGC        |
| * <i>Aspergillus flavus</i> NRRL3357                              | Aspfl1                   | Eurotiomycetes (Ascomycota)  | JGI (mycocosm.jgi.doe.gov) | TATACTCGACTGTGTGGCATCGGAGGATAAATCGTCTACTGATGCCCGGAGGTCAGAC     |
| * <i>Aspergillus karnatakensis</i> CBS 102800 v1.0                | Aspkar1                  | Eurotiomycetes (Ascomycota)  | JGI (mycocosm.jgi.doe.gov) | TTCACCCCACTTAATTCACGACACCTGTAAACCCAGCCCCCTCCGCTCATATACCA       |
| * <i>Aspergillus minisclerotigenes</i> CBS 117635 v1.0            | Aspmin1                  | Eurotiomycetes (Ascomycota)  | JGI (mycocosm.jgi.doe.gov) | CTAAAAATGATAACGAGGAGTAGATTACTCCAGCGCTCATTTCCACTCATCTGAAACT     |
| * <i>Aspergillus multicolor</i> v1.0                              | Aspml1                   | Eurotiomycetes (Ascomycota)  | JGI (mycocosm.jgi.doe.gov) | CTACTCAATTTGATACCGACTTGTGTCGCCACCACTCTCTCATTTCCACTAGCCAGATA    |
| * <i>Aspergillus nakazawae</i> v1.0                               | Aspnaka1                 | Eurotiomycetes (Ascomycota)  | JGI (mycocosm.jgi.doe.gov) | TCAACGGTGGTAGCGAGGGGTCGATTACTCCACCGCTCGTTGCCACTCATTTGGTCTTC    |
| * <i>Aspergillus neoauricomus</i> CBS112787 v1.0                  | Aspneoal                 | Eurotiomycetes (Ascomycota)  | JGI (mycocosm.jgi.doe.gov) | JGI (mycocosm.jgi.doe.gov)                                     |
| * <i>Aspergillus nidulans</i>                                     | Aspnid1                  | Eurotiomycetes (Ascomycota)  | JGI (mycocosm.jgi.doe.gov) | CTACGCGCTAGCGGTTGCCTCTTTTTCAACATAGCGCAGGGTCTGACGACTCCACCGCTC   |
| * <i>Aspergillus novoparasiticus</i> CBS 126849 v1.0              | Aspnovo                  | Eurotiomycetes (Ascomycota)  | JGI (mycocosm.jgi.doe.gov) | CTAGGCGACTCAGCGGAAATTGTATCGCAAAAGTAGTCAACTCCACAGCTCATTACCAC    |
| * <i>Aspergillus oryzae</i> RIB40                                 | Aspor1                   | Eurotiomycetes (Ascomycota)  | JGI (mycocosm.jgi.doe.gov) | CTAAAAATGATAACGAGGAGTAGATTACTCCAGCGCTCATTTCCACTCATCTGAAACT     |
| * <i>Aspergillus ostianus</i> v1.0                                | Aspostil                 | Eurotiomycetes (Ascomycota)  | JGI (mycocosm.jgi.doe.gov) | TCAACGGTGGTAGCGAGGGGTCGATTACTCCACCGCTCGTTGCCACTCATTTGGTCTTC    |
| * <i>Aspergillus parvisclerotigenus</i> CBS 121.62 v1.0           | Asppari1                 | Eurotiomycetes (Ascomycota)  | JGI (mycocosm.jgi.doe.gov) | CTAAAAATGATAACGAGGAGTAGATTACTCCAGCGCTCATTTCCACTCATCTGAAACT     |
| * <i>Aspergillus petrakii</i> CBS 105.57 v1.0                     | Asppet1                  | Eurotiomycetes (Ascomycota)  | JGI (mycocosm.jgi.doe.gov) | TATCTCGGATTCCTTGAAATGGCAAGAGTTGACGCTCTAGACGCTCAACCAAGAAC       |
| * <i>Aspergillus pseudocaelatus</i> CBS 117616 v1.0               | Aspsecl1                 | Eurotiomycetes (Ascomycota)  | JGI (mycocosm.jgi.doe.gov) | CTAAAAATGATAACGAGAAGTTGATTCACTCCAGCGCTCATTTCCGCTCATCTGAAACT    |
| * <i>Aspergillus pseudotamarii</i> CBS 117625 v1.0                | Aspsset1                 | Eurotiomycetes (Ascomycota)  | JGI (mycocosm.jgi.doe.gov) | CTAGTTCGCACTAGCGGAAATTTGATCCGTAACGCTACACTCCACAGCTCATTTGCCG     |
| * <i>Aspergillus quadrilineatus (floriformis)</i> CBS 937.73 v1.0 | Aspqnafl                 | Eurotiomycetes (Ascomycota)  | JGI (mycocosm.jgi.doe.gov) | CTACGCGCTAGCGGTTGCCTCTTTTTCAACATAGCGCAGGGTCTGACGCTCAACCGCTC    |
| * <i>Aspergillus recurvatus</i> v1.0                              | Asprecl1                 | Eurotiomycetes (Ascomycota)  | JGI (mycocosm.jgi.doe.gov) | CTAGCGGCTATTCGGCGAGTTGTAGCGTGTAGTCTCAGACTCCAACTCATTTCCACT      |
| * <i>Aspergillus sergii</i> CBS 130017 v1.0                       | Aspsr1                   | Eurotiomycetes (Ascomycota)  | JGI (mycocosm.jgi.doe.gov) | CTAGGCGAGTATGGCGAAATTTGTATCGCAAAAGTAGTCAACTCCACAGCTCATTTCCAC   |
| * <i>Aspergillus sesamicola</i> CBS 137324 v1.0                   | Aspses1                  | Eurotiomycetes (Ascomycota)  | JGI (mycocosm.jgi.doe.gov) | TCAGGCTGCAATTGAGACATAGATGGACGCTACTATTGCTACTAGTACTCCGGAGTAGA    |
| * <i>Aspergillus similis</i> v1.0                                 | Aspsim1                  | Eurotiomycetes (Ascomycota)  | JGI (mycocosm.jgi.doe.gov) | GGGTTGACGTCGGGAGGAGAAACAAGAAACACTTTTGGTTTGCACCCAGCTAGTACGC     |
| * <i>Aspergillus sublatius</i> IBT 19356 v1.0                     | Aspsublat1               | Eurotiomycetes (Ascomycota)  | JGI (mycocosm.jgi.doe.gov) | CTAGCGCTGATTCGGCGAGTTGTAGCGCTGAGTCTGCTGCTGACGACTCCAACTTTCCACT  |
| * <i>Aspergillus sydowii</i> CBS 593.65 v1.0                      | Aspsyl1                  | Eurotiomycetes (Ascomycota)  | JGI (mycocosm.jgi.doe.gov) | ATACCGGCTCGTAGTCCGAGACCAGCTCATTTCCACTCGCCATATATTTCAAGGCGCTG    |
| * <i>Aspergillus taichungensis</i> IBT 19404 v1.0                 | Asptaic1                 | Eurotiomycetes (Ascomycota)  | JGI (mycocosm.jgi.doe.gov) | TTAGTTAGGCGAGTTATAGCGAAGAGTAGTCAAACCTCCAACTCATTTCCACTAAATCT    |
| * <i>Aspergillus tanneri</i> DTO 303-18 v1.0                      | Asptan1                  | Eurotiomycetes (Ascomycota)  | JGI (mycocosm.jgi.doe.gov) | TTATGAGGTGACTCTTATTTGAGCTGGCTCTGCTCGGTACGAGATGAATTTGCATAGTAC   |
| * <i>Aspergillus transmontanensis</i> CBS 130015 v1.0             | Asptral1                 | Eurotiomycetes (Ascomycota)  | JGI (mycocosm.jgi.doe.gov) | CTAGGCGACTAGGCGAAATTTGTATCGCAAAAGTAGTCAACTCCACAGCTCATTTCCAG    |
| * <i>Aspergillus tritici</i> CBS266.81 v1.0                       | Asptr1                   | Eurotiomycetes (Ascomycota)  | JGI (mycocosm.jgi.doe.gov) | CTAGTTAGGCGAGTTATAGCGAAGTGTAGTCAAGCTCCAACTCATTTCCACTAAATCT     |
| * <i>Aspergillus varians</i> CBS 505.65 v1.0                      | Aspvar1                  | Eurotiomycetes (Ascomycota)  | JGI (mycocosm.jgi.doe.gov) | CTAGTTCAAGAGGAGAGAATAGGATCTGTAGTCTAGGTATCCATGGATCTATATTTTA     |
| * <i>Aspergillus versicolor</i> v1.0                              | Aspvel1                  | Eurotiomycetes (Ascomycota)  | JGI (mycocosm.jgi.doe.gov) | CAACTTCCCAGACTCGCGCGAGTTTACTCCCCGAGCGATGGCTAGACCCGGAAGAGGCT/   |
| * <i>Aspergillus waksmanii</i> IBT 31900 v1.0                     | Aspwak1                  | Eurotiomycetes (Ascomycota)  | JGI (mycocosm.jgi.doe.gov) | CCCATATGAACGCATCCGACGTTGATTCGGCGAGTTGTAGCGCTGAGCTCGTACAGCTC    |
| * <i>Aspergillus westerdijkiae</i> CBS 112803 v1.0                | Aspwest1                 | Eurotiomycetes (Ascomycota)  | JGI (mycocosm.jgi.doe.gov) | TCAACGATGGTAGGAGGGGTCGATTCACTCCACCGCTCGTCCACTCATTTGGTCTTC      |
| * <i>Penicillium antarcticum</i> DTO 356-E5 v1.0                  | Penantal                 | Eurotiomycetes (Ascomycota)  | JGI (mycocosm.jgi.doe.gov) | TTATTGCCGATATCTTGGATGCCACTGACTCCAAGTCTCATTTCCACGCATAAAAACCTTTC |
| * <i>Penicillium atramentosum</i> RS17 v1.0                       | Penatral                 | Eurotiomycetes (Ascomycota)  | JGI (mycocosm.jgi.doe.gov) | TTATTGCCGATATCTTGGATGCCACTGACTCCAAGTCTCATTTCCACGCATAAAAACCTTTC |
| * <i>Penicillium brasilianum</i> MG11                             | Penbral                  | Eurotiomycetes (Ascomycota)  | JGI (mycocosm.jgi.doe.gov) | TTACTTTTGGTAGCGAGGAGTCCACTGAGTCCATGTCTCCATTCCACTCATAAAGTATTC   |
| * <i>Penicillium coprophilum</i> IBT 31321                        | Pencop1                  | Eurotiomycetes (Ascomycota)  | JGI (mycocosm.jgi.doe.gov) | GTCAGTCTTATTTCGAGCAAAAATGTTACTGCTGAGGCGAAAGGTCAGGTTACTAATCAT   |
| * <i>Penicillium decumbens</i> IBT 11843                          | Pendec1                  | Eurotiomycetes (Ascomycota)  | JGI (mycocosm.jgi.doe.gov) | CGGAAAACCGAGGAGTCACTTCGTCGGATAGCTGAGTTGTAGTATGATGATGATGATAGT   |
| * <i>Penicillium flavigenum</i> IBT 14082                         | Penflal                  | Eurotiomycetes (Ascomycota)  | JGI (mycocosm.jgi.doe.gov) | CTCTGTTGATATAGCGTCCATGCAAGTACTACTCGTCCGCACTCTTGTGATATAA        |
| * <i>Penicillium janthinellum</i> ATCC 10455 v1.0                 | Penjal                   | Eurotiomycetes (Ascomycota)  | JGI (mycocosm.jgi.doe.gov) | GTCCATTCACCTCTTGGTATAGAGGAGTTGTGATGCTGAGGCGAAAGGTCAGGTTACTA    |
| * <i>Penicillium nalgiovense</i> FM193                            | Pennall                  | Eurotiomycetes (Ascomycota)  | JGI (mycocosm.jgi.doe.gov) | GCATATAACTACTTACTTATTGTAATAAAGTTCGTTGGACCAAGAGGATTCGCTATA      |
| * <i>Penicillium steckii</i> IBT 24891                            | Penstel                  | Eurotiomycetes (Ascomycota)  | JGI (mycocosm.jgi.doe.gov) | GGCCAGCATACTGTACATCGCCGTTGCGCAGCGCTATACCATCTTGTGTGAAACCAAAA    |
| * <i>Penicillium swiecickii</i> 182 6C1 v1.0                      | Penswil                  | Eurotiomycetes (Ascomycota)  | JGI (mycocosm.jgi.doe.gov) | GAGCTTTCAGCTCAAAAAGTGTGGGACTAAAGTTTGTAGCGGCTGGTCAAAAATCTCT     |
| * <i>Hypoxylon monticulosum</i> FL0542 v1.0                       | Hypmon1                  | Sordariomycetes (Ascomycota) | JGI (mycocosm.jgi.doe.gov) | TCAACGACTTCTGTATAAAAAGCAAGACCCCACTCTTATTGACCGTGGCTAGGAAGAC     |
| * <i>Hypoxylon trugodes</i> CBS 135444 v1.0                       | Hyptru1                  | Sordariomycetes (Ascomycota) | JGI (mycocosm.jgi.doe.gov) | AACTAGCATACTTCGGATTTCTACGCCATATTTGATCTCTCGCATTTGATAAACTTCTAGA  |
| * <i>Xylaria cf. castorea</i> CBS 124033 v1.0                     | Xyleas1240               | Sordariomycetes (Ascomycota) | JGI (mycocosm.jgi.doe.gov) | CTAGGGTAGGGGAGGTTAAATGCGGTGAAATCTTAATTTTCGTAGGCACTCCGTGAGA     |
| * <i>Xylaria curta</i> CBS 114988 v1.0                            | Xylcur1149               | Sordariomycetes (Ascomycota) | JGI (mycocosm.jgi.doe.gov) | CTGTTATATGGGTATATAAAAAGCAAGTGGTAAATGATGATGATGATGATGATGATGATG   |
| * <i>Xylaria hypoxylon</i> OSC100004 v1.0                         | Xylhyp1                  | Sordariomycetes (Ascomycota) | JGI (mycocosm.jgi.doe.gov) | TCAGTTAACTAGAGTAGCGAAGCGTGTCTTGTCTCAAAAGGTTACTATTCCACTCATTC    |
| * <i>Xylaria sp.</i> FL0043 v1.0                                  | XylFL0043                | Sordariomycetes (Ascomycota) | JGI (mycocosm.jgi.doe.gov) | CTAATAGCGAATAGAGCCAGGCTATGCACTCTGCAAGCTCTTCGGCTGCCAGCTG        |
| * <i>Xylariaceae sp.</i> AK1471 v1.0                              | XyAK1471                 | Sordariomycetes (Ascomycota) | JGI (mycocosm.jgi.doe.gov) | TCAGTAACTTAGAGTATCGAAGGGTGGTCTTGTCTCAGAGCTCATTTGCCGCTCATCTG    |





|                                                  |            |                              |                            |                                                                 |
|--------------------------------------------------|------------|------------------------------|----------------------------|-----------------------------------------------------------------|
| <i>Cercospora berteroa</i> CBS 538.71            | Cerbe1     | Dothideomycetes (Ascomycota) | JGI (mycocosm.jgi.doe.gov) | TTATGATCCAACACTGCACCACCCAGCAGCTCTGGATGACCAGAATTGAACTCCTCCGCAT   |
| <i>Cercospora zeae-maydis</i> v1.0               | Cerzm1     | Dothideomycetes (Ascomycota) | JGI (mycocosm.jgi.doe.gov) | TTATGATCCAACATTACCACACTCAGCAGCCGGATTCCGGTAATTAACCTCCTCCTCATC    |
| <i>Phyllosticta capitalensis</i> CBS 173.77 v2.0 | Phycapi2   | Dothideomycetes (Ascomycota) | JGI (mycocosm.jgi.doe.gov) | CTACCCGGTCCGCTTGACTCCGAAAATCCATAGCGGGGAGTGGTGATGCTCCAATGCAAAAT  |
| <i>Phyllosticta citriasiana</i> CBS 120486 v1.0  | Phycit1    | Dothideomycetes (Ascomycota) | JGI (mycocosm.jgi.doe.gov) | CACCTTTCCCTGTCCCGCGCCCGTCCACCACITTTATCAAGCATCGCTTGCCCGTGTGT     |
| <i>Phyllosticta citricarpa</i> CBS 141352 v1.0   | Peit141352 | Dothideomycetes (Ascomycota) | JGI (mycocosm.jgi.doe.gov) | TTACCCCTCGACTCTGAAAATCCGTAGCGCGGAGTCTGTATGCTCCAATGCAAGTGGC      |
| <i>Phyllosticta citricarpa</i> CBS 127454 v1.0   | Phycitr1   | Dothideomycetes (Ascomycota) | JGI (mycocosm.jgi.doe.gov) | TTACATGCCGGCAAAGGACGAACTGTCTGCTCGACTCCGAAAATCCGTACCCGGGAGTTC    |
| <i>Phyllosticta sp.</i> CPC 27913 v1.0           | Phycpc1    | Dothideomycetes (Ascomycota) | JGI (mycocosm.jgi.doe.gov) | TGAAAATCCGTAGCGCGGAGTCTGTATGCTCCAATGCAAGTGGCCGCTCATGAGATCCT     |
| <i>Colletotrichum cereale</i> CBS 129662 v1.0    | Colce1     | Sordariomycetes (Ascomycota) | JGI (mycocosm.jgi.doe.gov) | CTAAGCCGTCGAAGGTGCGTTGTAGCGCAGTGTCTGCTCCAAAAGCTCGTTCCCGCT       |
| <i>Colletotrichum eremochloae</i> CBS129661 v1.0 | Coler1     | Sordariomycetes (Ascomycota) | JGI (mycocosm.jgi.doe.gov) | TTTGAAGGCAGACTCAAATTCAAAATAAAAAATAAAAAATACATCGTGAAGTGACCAGTCTT  |
| <i>Colletotrichum godetiae</i> CBS 193.32 v1.0   | Colgo1     | Sordariomycetes (Ascomycota) | JGI (mycocosm.jgi.doe.gov) | CTAGACAGAGTGATATCTTGGAGTAATGTCTGCCATGCCTCATTCCCACTCATTGATA      |
| <i>Colletotrichum orbiculare</i> 104-T           | Colorb1    | Sordariomycetes (Ascomycota) | JGI (mycocosm.jgi.doe.gov) | CTAAGCGGTGGAGGAGCATTGTACCGCAAACGTGGTCTTGCTCCAAAAGCTCGTTGCCGC    |
| <i>Colletotrichum sublineola</i> CBS 131301 v1.0 | Colsu1     | Sordariomycetes (Ascomycota) | JGI (mycocosm.jgi.doe.gov) | ATACCCGGGAGTTGTCCGGTCCAGAGCTCGTTTCCACTCATCTGGTACTCCAAGCCTT      |
| <i>Colletotrichum zoysiae</i> MAFF235873 v1.0    | Colzo1     | Sordariomycetes (Ascomycota) | JGI (mycocosm.jgi.doe.gov) | GTTACAGCACATTACATACGCTTCCGGTAGTCTTGATCCGTATAAECTTAATTGCTTTCAATI |
| <i>Fusarium redolens</i> MPI-CAGE-AT-0023 v1.0   | Fusre1     | Sordariomycetes (Ascomycota) | JGI (mycocosm.jgi.doe.gov) | CTACTCAGAAATAGCGACGTGTAGTCTTGCTCCAGAGCTCATTGCCACTCATCTGATACT    |
| <i>Fusarium avenaceum</i> MPI-SDFR-AT-0044 v1.0  | Fustril    | Sordariomycetes (Ascomycota) | JGI (mycocosm.jgi.doe.gov) | TTACACGTTGTTATACCGAGGTGTC AACCTGCTCCATGCTTCAATTGCCGCTCATTGATAC  |
| <i>Hypoxylon sp.</i> FL1284 v2.0                 | HyFL1284   | Sordariomycetes (Ascomycota) | JGI (mycocosm.jgi.doe.gov) | CTGCATAATAAGCCACTTGCA TGTAGGTACCTCTCAAATGTTTGCATTTATTGGTAAGCCT  |
| <i>Xylaria scruposa</i> CBS 123580 v1.0          | Xylscr1    | Sordariomycetes (Ascomycota) | JGI (mycocosm.jgi.doe.gov) | CGATGATACATGTACGATGCCCTCA TTA CTCCAAAAGGTGCTAGGTACCCGAATGTGGT   |
| <i>Xylariaceae sp.</i> FL0662B v1.0              | XylFL0662B | Sordariomycetes (Ascomycota) | JGI (mycocosm.jgi.doe.gov) | GTGTAGAGTAAAAATCACATATGAAGTAAGTTAAATACTAAACTATGAATGACCAGACA     |

<sup>a</sup> Asterisks indicate sequences of 60 fungal species used in the phylogenetic analysis shown in supplemental figure S6.

**Supplemental table S2. Amino acid sequences of deoxyphomenone biosynthesis (DPH) genes from *Hansfordia pulvinata* and *Aspergillus* species**

| Organism                                              | Gene function                              | DDBJ accession number<br>or JGI protein ID <sup>a</sup> | Protein sequence <sup>b</sup>  | Database                   |
|-------------------------------------------------------|--------------------------------------------|---------------------------------------------------------|--------------------------------|----------------------------|
| <i>Hansfordia pulvinata</i> 414-3                     | Esterase (HP001952)                        | LC779504                                                | MDASTALGLIPTISRSFYGVAAASA      | DDBJ/NCBI/EMBL             |
| <i>Hansfordia pulvinata</i> 414-3                     | Integral membrane ptoein (HP001953)        | LC779505                                                | MAGEENKGGPGFTAACIIVTVAAVL      | DDBJ/NCBI/EMBL             |
| <i>Hansfordia pulvinata</i> 414-3                     | Sesquiterpene synthase (DPH1, HP001954)    | LC779506                                                | MLSTLRSFELHKLGLTGSSSNDST       | DDBJ/NCBI/EMBL             |
| <i>Hansfordia pulvinata</i> 414-3                     | Short chain dehydrogenase (DPH2, HP001955) | LC779507                                                | MTTLRLSQAaipDCTGKTVVITGGS      | DDBJ/NCBI/EMBL             |
| <i>Hansfordia pulvinata</i> 414-3                     | CytochromeP450 (DPH3, HP001956)            | LC779508                                                | MALITLALLCVAAWVLRRLGLAVY       | DDBJ/NCBI/EMBL             |
| <i>Hansfordia pulvinata</i> 414-3                     | CytochromeP450 (DPH4, HP001957)            | LC779509                                                | MAPRPTSGFWLVFAVS WLQV V        | DDBJ/NCBI/EMBL             |
| <i>Hansfordia pulvinata</i> 414-3                     | CytochromeP450 (DPH5, HP001958)            | LC779510                                                | MSLTV DLEALRWKLV P VLLAFLSW    | DDBJ/NCBI/EMBL             |
| <i>Hansfordia pulvinata</i> 414-3                     | MFS transporter (DPH6, HP001959)           | LC779511                                                | MATEKHPASLPGSQDAPPKTEAPP       | DDBJ/NCBI/EMBL             |
| <i>Aspergillus oryzae</i> RIB40                       | Esterase                                   | 10092*                                                  | MAGLWLGLGFTAGKSIATLWSAI        | JGI (mycocosm.jgi.doe.gov) |
| <i>Aspergillus oryzae</i> RIB40                       | Integral membrane ptoein                   | 10091*                                                  | MGAKENKGGPGMTAASIVLTVIAV       | JGI (mycocosm.jgi.doe.gov) |
| <i>Aspergillus oryzae</i> RIB40                       | Sesquiterpene synthase (AoDPH1)            | 10090                                                   | MLQRLWALSTSAIKLPFPFSGAP        | JGI (mycocosm.jgi.doe.gov) |
| <i>Aspergillus oryzae</i> RIB40                       | Short chain dehydrogenase (AoDPH2)         | 10089*                                                  | MASMLSDADIPSCAGKTVVITGG        | JGI (mycocosm.jgi.doe.gov) |
| <i>Aspergillus oryzae</i> RIB40                       | CytochromeP450 (AoDPH3)                    | 10088*                                                  | MTLISL SLLALS LSWIIRVLV IYRLA' | JGI (mycocosm.jgi.doe.gov) |
| <i>Aspergillus oryzae</i> RIB40                       | CytochromeP450 (AoDPH5)                    | 10086                                                   | MRSSTQLTALY WVHLVIYNVFFHP      | JGI (mycocosm.jgi.doe.gov) |
| <i>Aspergillus oryzae</i> RIB40                       | CytochromeP450 (AoDPH4)                    | 10087*                                                  | MDLFPRDYLFAGLAVFIFWIIDH        | JGI (mycocosm.jgi.doe.gov) |
| <i>Aspergillus oryzae</i> RIB40                       | MFS transporter (AoDPH6)                   | 10084                                                   | MSTKTRSSQTGETAVSSRISTPATLI     | JGI (mycocosm.jgi.doe.gov) |
| <i>Aspergillus flavus</i> NRRL3357 v1.0               | Esterase                                   | 2229159                                                 | MAGLWLGLGFTAGKSIATLWSAI        | JGI (mycocosm.jgi.doe.gov) |
| <i>Aspergillus flavus</i> NRRL3357 v1.0               | Integral membrane ptoein                   | 2229158                                                 | MGAKENKGGPGMTAASIVLTVIAV       | JGI (mycocosm.jgi.doe.gov) |
| <i>Aspergillus flavus</i> NRRL3357 v1.0               | Sesquiterpene synthase                     | 1834709                                                 | MLQRLWALSTSAIKLPFPFSGAP        | JGI (mycocosm.jgi.doe.gov) |
| <i>Aspergillus flavus</i> NRRL3357 v1.0               | Short chain dehydrogenase                  | 2200580*                                                | MASMLSDADIPSCAGKTVVITGG        | JGI (mycocosm.jgi.doe.gov) |
| <i>Aspergillus flavus</i> NRRL3357 v1.0               | CytochromeP450                             | 2200579                                                 | MTLISL SLLALS LSWIIRVLV IYRLA' | JGI (mycocosm.jgi.doe.gov) |
| <i>Aspergillus flavus</i> NRRL3357 v1.0               | CytochromeP450                             | 2063894                                                 | MRSSTQLTALY WIHLAIYNVFFHPI     | JGI (mycocosm.jgi.doe.gov) |
| <i>Aspergillus flavus</i> NRRL3357 v1.0               | CytochromeP450                             | 2062078                                                 | MDLFPRDYLFAGLAVFIFWIIDH        | JGI (mycocosm.jgi.doe.gov) |
| <i>Aspergillus flavus</i> NRRL3357 v1.0               | MFS transporter                            | 2210056                                                 | MSTKTRSSQTGETAVSSRISTPATLI     | JGI (mycocosm.jgi.doe.gov) |
| <i>Aspergillus parvisclerotigenus</i> CBS 121.62 v1.0 | Esterase                                   | 166540                                                  | MAGLWLGLGFTAGKSIATLWSAI        | JGI (mycocosm.jgi.doe.gov) |
| <i>Aspergillus parvisclerotigenus</i> CBS 121.62 v1.0 | Integral membrane ptoein                   | 166547                                                  | MGAKENKGGPGMTAASIVLTVIAV       | JGI (mycocosm.jgi.doe.gov) |
| <i>Aspergillus parvisclerotigenus</i> CBS 121.62 v1.0 | Sesquiterpene synthase                     | 403455*                                                 | MLQRLWALSTSAIKLPFPFSGAP        | JGI (mycocosm.jgi.doe.gov) |
| <i>Aspergillus parvisclerotigenus</i> CBS 121.62 v1.0 | Short chain dehydrogenase                  | 403457                                                  | MASMLSDADIPSCAGKTVVITGG        | JGI (mycocosm.jgi.doe.gov) |
| <i>Aspergillus parvisclerotigenus</i> CBS 121.62 v1.0 | CytochromeP450                             | 403457                                                  | MTLISL SLLALS LSWIIRVLV IYRLA' | JGI (mycocosm.jgi.doe.gov) |
| <i>Aspergillus parvisclerotigenus</i> CBS 121.62 v1.0 | CytochromeP450                             | 375701                                                  | MRSSTQLTALY WVHLVIYNVFFHP      | JGI (mycocosm.jgi.doe.gov) |
| <i>Aspergillus parvisclerotigenus</i> CBS 121.62 v1.0 | CytochromeP450                             | 334960*                                                 | MDLFPRDYLFAGLAVFIFWIIDH        | JGI (mycocosm.jgi.doe.gov) |
| <i>Aspergillus parvisclerotigenus</i> CBS 121.62 v1.0 | MFS transporter                            | 334970                                                  | MSTKTRSSQTGETAVSSRISTPATLI     | JGI (mycocosm.jgi.doe.gov) |
| <i>Aspergillus minisclerotigenes</i> CBS 117635 v1.0  | Esterase                                   | 229809*                                                 | MAGLWLGLGFTAGKSIATLWSAI        | JGI (mycocosm.jgi.doe.gov) |
| <i>Aspergillus minisclerotigenes</i> CBS 117635 v1.0  | Integral membrane ptoein                   | 242403                                                  | MGAKENKGGPGMTAASIVLTVIAV       | JGI (mycocosm.jgi.doe.gov) |
| <i>Aspergillus minisclerotigenes</i> CBS 117635 v1.0  | Sesquiterpene synthase                     | 229813*                                                 | MLQHLWAIATSAIKLPFPFSGAP        | JGI (mycocosm.jgi.doe.gov) |
| <i>Aspergillus minisclerotigenes</i> CBS 117635 v1.0  | Short chain dehydrogenase                  | 229813*                                                 | MASMLSDADIPSCAGKTVVITGG        | JGI (mycocosm.jgi.doe.gov) |
| <i>Aspergillus minisclerotigenes</i> CBS 117635 v1.0  | CytochromeP450                             | 251374                                                  | MTLISL SLLALS LSWIIRVLV IYRLA' | JGI (mycocosm.jgi.doe.gov) |
| <i>Aspergillus minisclerotigenes</i> CBS 117635 v1.0  | CytochromeP450                             | 229816                                                  | MDRVVWLSLAVALTALY WVHLVI       | JGI (mycocosm.jgi.doe.gov) |

|                                                      |                           |         |                                                                                  |
|------------------------------------------------------|---------------------------|---------|----------------------------------------------------------------------------------|
| <i>Aspergillus minisclerotigenes</i> CBS 117635 v1.0 | CytochromeP450            | 229815* | MDLLPRDYLFAGLAVFIFWWIIDH <sup>5</sup> JGI (mycocosm.jgi.doe.gov)                 |
| <i>Aspergillus minisclerotigenes</i> CBS 117635 v1.0 | MFS transporter           | 216838  | MSTKTRSSHTGETAVSSRISTPATPI JGI (mycocosm.jgi.doe.gov)                            |
| <i>Aspergillus caelatus</i> CBS 763.97 v1.0          | Esterase                  | 160431  | MAGLWLGLGLTASKSVAVALWSA JGI (mycocosm.jgi.doe.gov)                               |
| <i>Aspergillus caelatus</i> CBS 763.97 v1.0          | Integral membrane ptorein | 25776   | MGAKENKGPGMTAASIVLTVIAV <sup>5</sup> JGI (mycocosm.jgi.doe.gov)                  |
| <i>Aspergillus caelatus</i> CBS 763.97 v1.0          | Sesquiterpene synthase    | 147588* | MLQRLWSLSTSIAIKLPFQPVSF <sup>5</sup> GAP JGI (mycocosm.jgi.doe.gov)              |
| <i>Aspergillus caelatus</i> CBS 763.97 v1.0          | Short chain dehydrogenase |         | MAAIQLSDADIPSCAGKVVVITGG <sup>5</sup> JGI (mycocosm.jgi.doe.gov)                 |
| <i>Aspergillus caelatus</i> CBS 763.97 v1.0          | CytochromeP450            | 132601  | MTLIYLSLLVLCLWIISRVLVII <sup>5</sup> YRL <sup>A</sup> JGI (mycocosm.jgi.doe.gov) |
| <i>Aspergillus caelatus</i> CBS 763.97 v1.0          | CytochromeP450            | 147591* | MVDRVVWLSLAV <sup>5</sup> ALIALYWANLV JGI (mycocosm.jgi.doe.gov)                 |
| <i>Aspergillus caelatus</i> CBS 763.97 v1.0          | CytochromeP450            | 132604  | MDLFTRGYLLGGVVVCMFWWIVA JGI (mycocosm.jgi.doe.gov)                               |
| <i>Aspergillus caelatus</i> CBS 763.97 v1.0          | MFS transporter           | 160439  | MSTKTRSSQTGETAVSSGTSTPATL JGI (mycocosm.jgi.doe.gov)                             |
| <i>Aspergillus pseudocaelatus</i> CBS 117616 v1.0    | Esterase                  | 290130  | MAGLWLGLGLTASKSVAVALWSA JGI (mycocosm.jgi.doe.gov)                               |
| <i>Aspergillus pseudocaelatus</i> CBS 117616 v1.0    | Integral membrane ptorein | 91998   | MGAKENKGPGMTAASIVLTVIAV <sup>5</sup> JGI (mycocosm.jgi.doe.gov)                  |
| <i>Aspergillus pseudocaelatus</i> CBS 117616 v1.0    | Sesquiterpene synthase    | 290130* | MLQRLWSLSTSIAIKLPFQPVSF <sup>5</sup> GAP JGI (mycocosm.jgi.doe.gov)              |
| <i>Aspergillus pseudocaelatus</i> CBS 117616 v1.0    | Short chain dehydrogenase |         | MAAIQLSDADIPSCAGKVVVITGG <sup>5</sup> JGI (mycocosm.jgi.doe.gov)                 |
| <i>Aspergillus pseudocaelatus</i> CBS 117616 v1.0    | CytochromeP450            | 305986  | MTLIYLSLLVLCLWIISRVLVII <sup>5</sup> YRL <sup>A</sup> JGI (mycocosm.jgi.doe.gov) |
| <i>Aspergillus pseudocaelatus</i> CBS 117616 v1.0    | CytochromeP450            | 278998* | MVDRVVWLSLAV <sup>5</sup> ALIALYWANLV JGI (mycocosm.jgi.doe.gov)                 |
| <i>Aspergillus pseudocaelatus</i> CBS 117616 v1.0    | CytochromeP450            | 278999  | MDLFTREYLLGGVVVCMFWWIVA JGI (mycocosm.jgi.doe.gov)                               |
| <i>Aspergillus pseudocaelatus</i> CBS 117616 v1.0    | MFS transporter           | 290122  | MSTKTRSSQTGETAVSSGTSTHATI JGI (mycocosm.jgi.doe.gov)                             |
| <i>Aspergillus nakazawae</i> v1.0                    | Esterase                  | 234342  | MDQIRIGATVGKAVAAGVWGG <sup>5</sup> LA JGI (mycocosm.jgi.doe.gov)                 |
| <i>Aspergillus nakazawae</i> v1.0                    | Integral membrane ptorein | 234343  | MENKGP <sup>5</sup> MIAASIVLTTVAFL <sup>5</sup> FCI JGI (mycocosm.jgi.doe.gov)   |
| <i>Aspergillus nakazawae</i> v1.0                    | Sesquiterpene synthase    | 234344  | MLATIWTALSKASATPKSAEL <sup>5</sup> SPIE <sup>5</sup> JGI (mycocosm.jgi.doe.gov)  |
| <i>Aspergillus nakazawae</i> v1.0                    | Short chain dehydrogenase | 234345  | MSSLTITDADIPDCSGKTVVITGG <sup>5</sup> S <sup>5</sup> JGI (mycocosm.jgi.doe.gov)  |
| <i>Aspergillus nakazawae</i> v1.0                    | CytochromeP450            | 224099  | MAWFIVPVALLLLPAVIAVY <sup>5</sup> RLVLI JGI (mycocosm.jgi.doe.gov)               |
| <i>Aspergillus sesamicola</i> CBS 137324 v1.0        | Esterase                  | 344839* | MEQIRIGATVGKAVAAGVWGG <sup>5</sup> LA JGI (mycocosm.jgi.doe.gov)                 |
| <i>Aspergillus sesamicola</i> CBS 137324 v1.0        | Integral membrane ptorein | 301945  | MENNGP <sup>5</sup> MIAASIVLTTVAFL <sup>5</sup> FCI JGI (mycocosm.jgi.doe.gov)   |
| <i>Aspergillus sesamicola</i> CBS 137324 v1.0        | Sesquiterpene synthase    | 301946  | MLATIWAALSKASATPKSAE <sup>5</sup> FSP <sup>5</sup> IE JGI (mycocosm.jgi.doe.gov) |
| <i>Aspergillus sesamicola</i> CBS 137324 v1.0        | Short chain dehydrogenase | 344844  | MSTLTITDADIPDCSGKTFVITGG <sup>5</sup> S <sup>5</sup> JGI (mycocosm.jgi.doe.gov)  |
| <i>Aspergillus sesamicola</i> CBS 137324 v1.0        | CytochromeP450            | 344846  | MAWFIVPVALLLLPAVIAVY <sup>5</sup> RLVLI JGI (mycocosm.jgi.doe.gov)               |
| <i>Aspergillus neauricomus</i> CBS112787 v1.0        | Esterase                  | 169847  | MEQIRIGATVGKAVAAGVWGG <sup>5</sup> LA JGI (mycocosm.jgi.doe.gov)                 |
| <i>Aspergillus neauricomus</i> CBS112787 v1.0        | Integral membrane ptorein | 141434  | MENKGP <sup>5</sup> MIAASIVLTTVAFL <sup>5</sup> FCI JGI (mycocosm.jgi.doe.gov)   |
| <i>Aspergillus neauricomus</i> CBS112787 v1.0        | Sesquiterpene synthase    | 141433  | MLATIWTALSKASATPKSAEL <sup>5</sup> SPIE <sup>5</sup> JGI (mycocosm.jgi.doe.gov)  |
| <i>Aspergillus neauricomus</i> CBS112787 v1.0        | Short chain dehydrogenase | 141432  | MSSLTITDADIPDCSGKTVVITGG <sup>5</sup> S <sup>5</sup> JGI (mycocosm.jgi.doe.gov)  |
| <i>Aspergillus neauricomus</i> CBS112787 v1.0        | CytochromeP450            | 141431  | MKMAWFIVPVALLLLPAVIAVY <sup>5</sup> RL JGI (mycocosm.jgi.doe.gov)                |
| <i>Aspergillus ostianus</i> v1.0                     | Esterase                  | 185058  | MDQIRIGATVGKAVAIGVWGG <sup>5</sup> LA JGI (mycocosm.jgi.doe.gov)                 |
| <i>Aspergillus ostianus</i> v1.0                     | Integral membrane ptorein | 185057  | MENKGP <sup>5</sup> MIAASIVLTTVAFL <sup>5</sup> FCI JGI (mycocosm.jgi.doe.gov)   |
| <i>Aspergillus ostianus</i> v1.0                     | Sesquiterpene synthase    | 185056  | MLATIWTALSKASVTPKSADL <sup>5</sup> SPI <sup>5</sup> D JGI (mycocosm.jgi.doe.gov) |
| <i>Aspergillus ostianus</i> v1.0                     | Short chain dehydrogenase | 185055  | MASLTITDADIPDCSGKTVVITGG <sup>5</sup> S JGI (mycocosm.jgi.doe.gov)               |
| <i>Aspergillus ostianus</i> v1.0                     | CytochromeP450            | 185054  | MQAGLGDGPKWSGPSIRLSARAIT JGI (mycocosm.jgi.doe.gov)                              |
| <i>Aspergillus petrakii</i> CBS 105.57 v1.0          | Esterase                  | 285361  | MDQIRIGATVGKAVAAGVWGG <sup>5</sup> LA JGI (mycocosm.jgi.doe.gov)                 |
| <i>Aspergillus petrakii</i> CBS 105.57 v1.0          | Integral membrane ptorein | 285360  | MENKGP <sup>5</sup> MIAASIVLTTVAFL <sup>5</sup> FCI JGI (mycocosm.jgi.doe.gov)   |
| <i>Aspergillus petrakii</i> CBS 105.57 v1.0          | Sesquiterpene synthase    | 285359  | MLATIWTALSKASATPKSADV <sup>5</sup> SPIE <sup>5</sup> JGI (mycocosm.jgi.doe.gov)  |
| <i>Aspergillus petrakii</i> CBS 105.57 v1.0          | Short chain dehydrogenase | 285358  | MASLTITDADIPDCSGKTVVITGG <sup>5</sup> S JGI (mycocosm.jgi.doe.gov)               |
| <i>Aspergillus petrakii</i> CBS 105.57 v1.0          | CytochromeP450            | 296418  | MTMAWFIVPVALLLLPVAIAVY <sup>5</sup> RL JGI (mycocosm.jgi.doe.gov)                |

|                                                            |                           |         |                                                       |
|------------------------------------------------------------|---------------------------|---------|-------------------------------------------------------|
| <i>Aspergillus westerdijkiae</i> CBS 112803 v1.0           | Esterase                  | 289693  | MDQIRIGATVGKAVAAGVWGGGLA JGI (mycocosm.jgi.doe.gov)   |
| <i>Aspergillus westerdijkiae</i> CBS 112803 v1.0           | Integral membrane ptorein | 265657  | MENKGPGMIAASIVLTTVAFILFCL JGI (mycocosm.jgi.doe.gov)  |
| <i>Aspergillus westerdijkiae</i> CBS 112803 v1.0           | Sesquiterpene synthase    | 265656  | MLATIWTALSKASPTPKSAELSPIEF JGI (mycocosm.jgi.doe.gov) |
| <i>Aspergillus westerdijkiae</i> CBS 112803 v1.0           | Short chain dehydrogenase | 265655* | MASLTITDADIPDCSGKTVVITGGS JGI (mycocosm.jgi.doe.gov)  |
| <i>Aspergillus westerdijkiae</i> CBS 112803 v1.0           | CytochromeP450            | 289683  | MAWLIVSVALLLPVVIAVYRLVLI JGI (mycocosm.jgi.doe.gov)   |
| <i>Aspergillus amoeneus</i> CBS 111.32 v1.0                | Sesquiterpene synthase    | 227190  | MPSAIDTDAISTQLLNGVAKRHSF JGI (mycocosm.jgi.doe.gov)   |
| <i>Aspergillus amoeneus</i> CBS 111.32 v1.0                | Short chain dehydrogenase | 227192  | MTSLDLSADDIPRLEGRTAITGGCS JGI (mycocosm.jgi.doe.gov)  |
| <i>Aspergillus amoeneus</i> CBS 111.32 v1.0                | CytochromeP450            | 227194  | MSASWVEQPNSLLDISKVVVFLTL' JGI (mycocosm.jgi.doe.gov)  |
| <i>Aspergillus dentatus</i> CBS 114.63 v1.0                | Sesquiterpene synthase    | 315840  | MPSAIDTDAISTQLLNGVGKSHSF JGI (mycocosm.jgi.doe.gov)   |
| <i>Aspergillus dentatus</i> CBS 114.63 v1.0                | Short chain dehydrogenase | 315842  | MTSLNLSVDDIPRLDGKTAITGGC JGI (mycocosm.jgi.doe.gov)   |
| <i>Aspergillus dentatus</i> CBS 114.63 v1.0                | CytochromeP450            | 315844  | MSASWVDEPSSLLGIFKVVVFLKK JGI (mycocosm.jgi.doe.gov)   |
| <i>Aspergillus nidulans</i>                                | Sesquiterpene synthase    | 8825    | MPSAIDTDAISTQLLNGVAKSHSF JGI (mycocosm.jgi.doe.gov)   |
| <i>Aspergillus nidulans</i>                                | Short chain dehydrogenase | 8823    | MYICPFRDTTNHRFLGGCSGIGWE JGI (mycocosm.jgi.doe.gov)   |
| <i>Aspergillus nidulans</i>                                | CytochromeP450            | 8821    | MSASWVDEPSSLLGIFEVVFLKRI JGI (mycocosm.jgi.doe.gov)   |
| <i>Aspergillus similis</i> v1.0                            | Sesquiterpene synthase    | 210129  | MPSAIDTDAISTQLLNGVAKSHSF JGI (mycocosm.jgi.doe.gov)   |
| <i>Aspergillus similis</i> v1.0                            | Short chain dehydrogenase | 175589  | MTSLNLSVDDIPRLDGKTAITGGC JGI (mycocosm.jgi.doe.gov)   |
| <i>Aspergillus similis</i> v1.0                            | CytochromeP450            | 210125  | MSASWVDEPSSLLGIFKVVVFLKK JGI (mycocosm.jgi.doe.gov)   |
| <i>Aspergillus quadrilineatus (floriformis)</i> CBS 937.7. | Sesquiterpene synthase    | 144829  | MPSAIDTDAISTQLLNGVAKSHSF JGI (mycocosm.jgi.doe.gov)   |
| <i>Aspergillus quadrilineatus (floriformis)</i> CBS 937.7. | Short chain dehydrogenase | 144831  | MTSLNLSVDDIPRLDGKTAITGGC JGI (mycocosm.jgi.doe.gov)   |
| <i>Aspergillus quadrilineatus (floriformis)</i> CBS 937.7. | CytochromeP450            | 145836  | MSASWVDEPSSLLGIFKVVVFLKK JGI (mycocosm.jgi.doe.gov)   |
| <i>Aspergillus clavatus</i> NRRL 1 from AspGD              | Sesquiterpene synthase    | 3242    | MPSAIDTGAISTQLLNGAIKSHSG JGI (mycocosm.jgi.doe.gov)   |
| <i>Aspergillus clavatus</i> NRRL 1 from AspGD              | Short chain dehydrogenase | 3244    | MTSLNLSVDDIPRLEGKTAITGIFY JGI (mycocosm.jgi.doe.gov)  |
| <i>Aspergillus clavatus</i> NRRL 1 from AspGD              | CytochromeP450            | 3246    | MSASWGYEPTSWLDIFTVVVFLVLT JGI (mycocosm.jgi.doe.gov)  |
| <i>Lyophyllum atratum</i> CBS 144462 v1.0                  | Sesquiterpene synthase    | 1784547 | MPEPPSSFIAHHPSTPQFNPLDPPLE JGI (mycocosm.jgi.doe.gov) |

<sup>a</sup> Asterisks indicate that the sequence information was reanalyzed based on the sequence of *A. oryzae* and re-annotated as protein seqneces. 403455, 229813, 147588, and 290130 were registered as one amino acid sequece consisting of *DPH1* and *DPH2* homologous genes. *DPH5* homologous sequences of *Aspergillus* species registered in JGI were reannotated based on the DIP\_001958 sequence.

**Supplemental table S3. Primer sequences used in this study**

| Primer name               | Primer sequence (5'-3')                         | Purpose                                                                |
|---------------------------|-------------------------------------------------|------------------------------------------------------------------------|
| Dpprx2LF3                 | <u>ACCATGATTACGCC</u> AGGAAGGTGGTCGTTACGAGT     | Amplification of the upstream of <i>DPHI</i> gene for pGW43_dpprx2ko   |
| Dpprx2LR3                 | <u>TAGGGAAC</u> TGCCAGGACTGTGCCTATGCCTGTGTG     |                                                                        |
| Dpprx2UF3                 | <u>AGCTGTTTCCTGGCA</u> GGATGTAAAGAGGGCAGTCG     | Amplification of the downstream of <i>DPHI</i> gene for pGW43_dpprx2ko |
| Dpprx2UR3                 | <u>GGCCAGTGAATTATCAA</u> AGGCAATGCAATGCGAAG     |                                                                        |
| pRM254 attL1_F            | <u>CCTGGCAGTTCCTACTCTC</u>                      | Amplification of <i>gen</i> cassettes for pGW43_dpprx2ko               |
| pRM254 attL2_R            | <u>TGCCAGGAAACAGCT</u> ATGAC                    |                                                                        |
| pPM43GW_RB_F              | <u>TTGATAAT</u> CTACTGGCCGTC                    |                                                                        |
| pPM43GW_LB_R              | <u>TGGCGTAA</u> TCATGGTCATAG                    |                                                                        |
| DPKOD-F                   | ACTACCACCACCACGACAGC                            | Screening for <i>DPHI</i> knocked-out mutants                          |
| DPKOD-R                   | AATTACACCCTTTGCGCCCT                            |                                                                        |
| DPKOU-F                   | ATTGAATCCTGTTGCCGGTC                            |                                                                        |
| DPKOU-R                   | ACGACATCGCCATCAACACG                            |                                                                        |
| pPTREX <sub>e</sub> GFP_F | ATTCTAGAAGTCTGAATAGTAGTTTGTGG                   | Amplification of <i>EGFP</i> cassettes                                 |
| pPTREX <sub>e</sub> GFP_R | CCATTGGTAACGAAATGTAAAAGCTAGG                    |                                                                        |
| AoDPH1_LB_F               | CGAGCAGTGAAAGTATCTCGGCGACACTCTCATTTGA           | Amplification of <i>AoDPH1</i> gene                                    |
| AoDPH1_LB_R               | CAGGACTTCTAGAATTGTGAGCCTTGACAGCTGGATATC         |                                                                        |
| AoDPH1_RB_F               | TTTCGTTACCAATGGCTCACACGCACCTCGTGCTGC            |                                                                        |
| AoDPH1_RB_R               | GGAGACCGGCAGATCATTTAAATGATACGTGATATGCTCGTCGATCG |                                                                        |
| AspDPH1_F                 | AACCTCAGTATCAAGCTACCG                           | Detection of <i>AoDPH1/AjDPH1</i> gene                                 |
| AspDPH1_R                 | GTCACGAGCTGTTTATGTACCG                          |                                                                        |
| EGFP_F                    | TGACCCTGAAGTTCATCTGCAC                          | Detection of insertion sequence                                        |
| EGFP_R                    | GATGTTGGCCGGATCTTGAAG                           |                                                                        |
| DP1953_F                  | AGAAGGGCTGAAAACGGTAGCTT                         | Detection of DIP_001953                                                |
| DP1953_R                  | GAATCCTGGAGATGCTGACGAT                          |                                                                        |
| DPDPH1-F                  | AGCTGTAGATGTCGTTGACC                            | Detection of <i>DPHI</i> gene                                          |
| DPDPH1-R                  | GCCTTCTACGCTGCTGTTTCT                           |                                                                        |
| DpACTrt_F1n               | AGGACTCTTACGTCGGTGAC                            | qPCR detection of <i>H. pulvinata</i> actin gene                       |
| DpACTrt_R1n               | TCCATGTCATCCCAGTTGGT                            |                                                                        |
| Dp1952rt_F1i              | GACAGCCCTGGGTCTTATCC                            | qPCR detection of DIP_001952                                           |
| Dp1952rt_R1i              | CCGGTGGGCTTTACCCATTA                            |                                                                        |
| Dp1953rt_F1i              | CTCGTGAACCAGCGCAAATA                            | qPCR detection of DIP_001953                                           |
| Dp1953rt_R1i              | GCGCACTTGATGAGGAACAT                            |                                                                        |
| Dp1954rt_F1i              | TTTGAGTACCGGAGAAGGA                             | qPCR detection of DPH1                                                 |
| Dp1954rt_R1i              | TCGTTGACCACCGAGATGT                             |                                                                        |
| Dp1955rt_F1i              | ATGACTACCCTTCGGCTGTC                            | qPCR detection of DPH2                                                 |
| Dp1955rt_R1i              | CACGTCGAAGAGGAACACG                             |                                                                        |
| Dp1956rt_F1i              | GGAGGGCCAGATCATCATAGG                           | qPCR detection of DPH3                                                 |
| Dp1956rt_R1i              | TGTCGAGGATGTGGAAGACG                            |                                                                        |
| Dp1957rt_F1i              | GATGAGCCTCGAGGAGCTG                             | qPCR detection of DPH4                                                 |
| Dp1957rt_R1i              | GAGAGCAGGTGGTACGTCA                             |                                                                        |
| Dp1958rt_F1i              | CAGGGAGAACATCCAGCAGA                            | qPCR detection of DPH5                                                 |
| Dp1958rt_R1i              | GGGACGTAGAACAGACTTCCA                           |                                                                        |
| Dp1959rt_F1i              | CGTTCTCGTCATCACTGTGC                            | qPCR detection of DPH6                                                 |
| Dp1959rt_R1i              | TCGGTGATCTAGGGATGGC                             |                                                                        |

<sup>a</sup> An overhang sequence in each primer for overlap with sequences at the ends of the linearized plasmid, *gen/gfp* cassettes, or genes is underlined.
